# Supplementary material for: Effects of combination drugs on antihypertensive medication adherence in a real-world setting: a Korean Nationwide Study
Source: PubMed Central journal article supplement — BMJ Open. 2019 Jun 22;9(6):e029862. doi: 10.1136/bmjopen-2019-029862 (PMC6596965; doi:10.1136/bmjopen-2019-029862), 2019-06-22
Supplement: bmjopen-2019-029862.draft_revisions.pdf [file bmjopen-2019-029862.draft_revisions.pdf]

# BMJ Open

BMJ Open is committed to open peer review. As part of this commitment we make the peer review history of every article we publish publicly available.

When an article is published we post the peer reviewers' comments and the authors' responses online. We also post the versions of the paper that were used during peer review. These are the versions that the peer review comments apply to.

The versions of the paper that follow are the versions that were submitted during the peer review process. They are not the versions of record or the final published versions. They should not be cited or distributed as the published version of this manuscript.

BMJ Open is an open access journal and the full, final, typeset and author-corrected version of record of the manuscript is available on our site with no access controls, subscription charges or pay-per-view fees (<http://bmjopen.bmj.com>).

If you have any questions on BMJ Open's open peer review process please email [info.bmjopen@bmj.com](mailto:info.bmjopen@bmj.com)

# BMJ Open

## A single pill combination of antihypertensives does improve adherence: A Korean nationwide study

|                               |                                                                                                                                                                                                                                                                                                                                                                                                                                                                                                                                                                                                                                                                         |
|-------------------------------|-------------------------------------------------------------------------------------------------------------------------------------------------------------------------------------------------------------------------------------------------------------------------------------------------------------------------------------------------------------------------------------------------------------------------------------------------------------------------------------------------------------------------------------------------------------------------------------------------------------------------------------------------------------------------|
| Journal:                      | <i>BMJ Open</i>                                                                                                                                                                                                                                                                                                                                                                                                                                                                                                                                                                                                                                                         |
| Manuscript ID                 | bmjopen-2019-029862                                                                                                                                                                                                                                                                                                                                                                                                                                                                                                                                                                                                                                                     |
| Article Type:                 | Research                                                                                                                                                                                                                                                                                                                                                                                                                                                                                                                                                                                                                                                                |
| Date Submitted by the Author: | 15-Feb-2019                                                                                                                                                                                                                                                                                                                                                                                                                                                                                                                                                                                                                                                             |
| Complete List of Authors:     | Kim, Seung Jae; Seoul National University Hospital, Family Medicine<br>Kwon, Oh Deog; Seoul National University Hospital, Family Medicine;<br>Navy Medical Office, ROK Submarine Force Command<br>Cho, BeLong; Seoul National University Hospital, Family Medicine; Seoul<br>National University College of Medicine, Family Medicine<br>Oh, Seung-Won; Healthcare System Gangnam Center, Seoul National<br>University Hospital, Family Medicine<br>Lee, Cheol Min; Healthcare System Gangnam Center, Seoul National<br>University Hospital, Family Medicine<br>Choi, Ho-Chun; Healthcare System Gangnam Center, Seoul National<br>University Hospital, Family Medicine |
| Keywords:                     | Hypertension < CARDIOLOGY, medication adherence, angiotensin II<br>receptor blocker, calcium channel blocker, single pill combination                                                                                                                                                                                                                                                                                                                                                                                                                                                                                                                                   |
|                               |                                                                                                                                                                                                                                                                                                                                                                                                                                                                                                                                                                                                                                                                         |

SCHOLARONE™  
Manuscripts

1  
2  
3  
4 **[Title Page]**  
5  
6

7 **A single pill combination of antihypertensives does improve adherence: A**  
8  
9 **Korean nationwide study**  
10  
11  
12

13  
14 Seung Jae Kim<sup>1</sup>, Oh Deog Kwon<sup>1, 2</sup>, BeLong Cho<sup>1, 4</sup>, Seung-Won Oh<sup>3</sup>,

15  
16  
17 Cheol Min Lee<sup>3</sup>, Ho Chun Choi<sup>3\*</sup>  
18  
19  
20  
21

22 <sup>1</sup>Department of Family Medicine, Seoul National University Hospital, Seoul, Republic  
23 of Korea  
24

25  
26  
27 <sup>2</sup>Navy Medical Office, ROK Submarine Force Command, Changwon, Republic of  
28 Korea  
29

30  
31  
32 <sup>3</sup>Department of Family Medicine, Healthcare System Gangnam Center, Seoul National  
33 University Hospital, Seoul, Republic of Korea  
34

35  
36  
37 <sup>4</sup>Department of Family Medicine, College of Medicine, Seoul National University,  
38 Seoul, Republic of Korea  
39  
40  
41  
42  
43  
44  
45

46 First author: Seung Jae Kim  
47  
48  
49  
50  
51

52 Correspondence to:  
53

54 Ho Chun Choi, MD, MPH  
55  
56

1  
2  
3  
4 Department of Family Medicine, Healthcare System Gangnam Center, Seoul National  
5  
6 University Hospital , 39<sup>th</sup> Fl, Gangnam Finance Center, 152 Teheran-ro, Gangnam-  
7  
8 gu, Seoul, South Korea 06236  
9

10  
11  
12 Phone: +(82-2)-2112-5746  
13

14  
15 Fax: +(82-2)-2112-5794  
16

17  
18 E-mail: [skyho331@gmail.com](mailto:skyho331@gmail.com)  
19  
20  
21  
22  
23  
24  
25  
26  
27  
28  
29  
30  
31  
32  
33  
34  
35  
36  
37  
38  
39  
40  
41  
42  
43  
44  
45  
46  
47  
48  
49  
50  
51  
52  
53  
54  
55  
56  
57  
58  
59  
60

## Abstract

**Objectives:** We tried to clarify whether single pill combination (SPC) of antihypertensives actually improves adherence using a representative national data in a real-world setting.

**Design:** A nationwide population-based study

**Setting:** We used a 2.2% cohort (N=1,048,061) of total population (N=46,605,433) that was randomly extracted by National Health Insurance of Korea from 2008 to 2013.

**Participants:** We included patients (N=116,677) who were prescribed with same antihypertensive drugs for at least one year and divided them into groups of ARB (Angiotensin-II-receptor-blocker) alone, CCB (Calcium-channel-blocker) alone, multiple pill combination (MPC) and SPC of ARB/CCB.

**Primary outcome measures:** Medication possession ratio (MPR), a frequently used indirect measurement method of medication adherence.

**Results:** Adjusted MPR was higher in combination therapy (89.7% in SPC, 87.2% in MPC) than monotherapy (81.6% in ARB, 79.7% in CCB), and MPR of SPC (89.7%, confidence interval, [CI] 89.3-90.0) was higher than MPR of MPC (87.2%, CI 86.7-87.7) ( $p<0.05$ ). In subgroup analysis, adherences of SPC and MPC were 92.3% (CI 91.5-93.0) versus 88.1% (CI 87.1-89.0) in aged 65-74 years and 89.3% (CI 88.0-90.7) versus 84.8% (CI 83.3-92.0) in 75 years or older ( $p<0.05$ ). According to total pill numbers, adherences of SPC and MPC were 90.9% (CI 89.8-92.0) versus 85.3% (CI 84.1-86.5) in 7-8 pills and 91.2% (CI 89.3-93.1) versus 82.5% (CI 80.6-84.4) in 9 or more ( $p<0.05$ ). The adherence difference between SPC and MPC started to increase

1  
2  
3  
4 at 5-6 pills and at 50-64 years ( $p<0.05$ ). When analyzed according to elderly status,  
5  
6 the adherence difference started to increase at 3-4 pills in the elderly (65 years and  
7  
8 older) and at 5–6 in the non-elderly group (20-64 years) ( $p<0.05$ ). These difference  
9  
10 all widened further with increasing age and the total medications.  
11  
12

13 **Conclusion:** SPC regimen demonstrated higher adherence than MPC and this  
14  
15 tendency is more pronounced with increasing age and total medications.  
16  
17

18 **Keywords** hypertension, medication adherence, angiotensin II receptor blocker,  
19  
20 calcium channel blocker, single pill combination  
21  
22  
23  
24  
25

#### 26 **Strengths and limitations of this study**

- 27  
28 ➤ Strength of this study is that we not only compared the adherence between combination  
29 and monotherapy of antihypertensive medications but also the adherence of single pill  
30 combination (SPC) and multiple pill combination (MPC) regimen in a real world by using  
31 National Health Insurance Service National Sample Cohort (NHIS-NSC), a representative  
32 large scale health insurance claim data of Korea accounting for 2.2% of total population.  
33
- 34 ➤ Another strength of this study is that we analyzed the differences in medication adherence  
35 of subjects who continued to take antihypertensive drugs for at least one year for the  
36 maximum of six observed years.  
37
- 38 ➤ NHIS-NSC could not provide detailed information regarding some specific factors that could  
39 affect the medication adherence such as education level, occupation, caregiver status, the  
40 family environment, and healthcare provider factors.  
41
- 42 ➤ We did not specify comorbidities according to severity, and only adjusted with the average  
43 number of diagnoses of the subject during the observation period.  
44  
45  
46  
47  
48  
49  
50  
51  
52  
53  
54  
55  
56

## Introduction

Adherence to medication is an explanation of drug taking behavior, and refers to taking the drug over the time, dose, and frequency prescribed by the healthcare provider (1). The World Health Organization (WHO) defines medication non-adherence as a medically ill state, because when medication adherence is low, the illness progresses and health outcome is low (1). Non-adherence may lead to various clinical risks. In many studies, low adherence is associated with higher mortality and hospitalization rates than higher adherence (2-4). Also in terms of health economics, non-adherent patients use healthcare resources more than do adherent patients, and consequently, the burden of social illness increases because of the increase in additional medical expenses (5-7). Non-adherence is observed more frequently for chronic than acute diseases, especially for hypertension, for which non-adherence is reported in 50–70% of cases (1, 7-9).

Adherence to medication is determined by the complexity of various aspects such as factors associated with the patient, condition, therapy, the healthcare system, and the social/economic status etc. (1, 5, 7, 10); thus, a strategic approach to the specific cause is needed to improve adherence. Among these many factors, there were some previous studies relating a lower number of medications taken by a patient with higher adherence in chronic diseases such as hypertension (11-15). This implies that selecting a single pill combination (SPC) prescription could increase adherence compared to a multiple pill combination (MPC) prescription (11-15). However, most previous research reported results obtained under certain center

1  
2  
3  
4 conditions or were short-term studies of small samples, and systematic field surveys  
5  
6 using real-world representative data were not common. Therefore, the aim of this  
7  
8 study was to investigate the effect of SPC on the adherence to antihypertensive  
9  
10 medication in a real-world setting. In order to do this, we first checked the overall  
11  
12 medication prescription status of hypertensive patients and investigated the relation  
13  
14 between multiple medication prescriptions, age, and medication adherence to  
15  
16 antihypertensive agents.  
17  
18  
19  
20  
21  
22  
23  
24  
25  
26  
27  
28  
29  
30  
31  
32  
33  
34  
35  
36  
37  
38  
39  
40  
41  
42  
43  
44  
45  
46  
47  
48  
49  
50  
51  
52  
53  
54  
55  
56  
57  
58  
59  
60



## Methods

### Data source

The data used in this study were obtained from a sample of the Korean National Health Insurance Service National Sample Cohort (NHIS-NSC). This data is a sample of 1,048,061 individuals, around 2.2% of the total population (N=46,605,433), and provides national health information according to sex, age, and income. In addition, this cohort data is obtained through continuous observation every year, and include qualification data (birth, death, sex, family relationship, address, property, income, insurance type), medical service use data (billing statement, medical record, diagnosis record, prescription record, etc.), and health examination data (Supplementary Figure 1) (16).

### Study population

In total, 206,739 hypertension patients taking antihypertensive medications were selected from the 2008 to 2013 NHIS-NSC (N=1,048,061, total outpatient prescriptions: 221,750,977 cases). Hypertension diagnosis was defined as all patients with the International Classification of Diseases Tenth Revision (ICD-10) codes that featured hypertension (I10, I11, I12, I13, I15). Our selection of antihypertensive agents was limited to dihydropyridine calcium channel blockers (CCB) and angiotensin II receptor blockers (ARB), the most commonly prescribed antihypertensive agents (17, 18), to exclude the effects of adherence due to the class effect of antihypertensive medications. Therefore, all single and compound drugs of CCB or ARB sold

1  
2  
3  
4 domestically from January 1, 2008 to December 31, 2013 were included according to  
5  
6 the Anatomical Therapeutic Chemical (ATC) classification system of drugs (19). This  
7  
8 totaled 108 types of drugs when classified according to the ATC system. Since the  
9  
10 Korean release date of Exforge® (amlodipine/valsartan combination), the first  
11  
12 ARB/CCB compound drug, was September 1, 2007, the analysis was started from  
13  
14 2008. Of the 167,793 patients taking targeted antihypertensive agents (ARB, CCB,  
15  
16 ARB/CCB compound), only those aged 20 years or older were selected (N=167,234).  
17  
18 To prevent statistical deviation because of extreme values, the upper 0.01% value for  
19  
20 the number of drugs and diagnoses and missing values were excluded. Most ARB,  
21  
22 CCB, and SPC of ARB/CCB are prescribed as a once-a-day dosing. When a high-  
23  
24 dose prescription is needed in Korea, most clinicians prescribe one tablet high dose  
25  
26 rather than two tablets regular dose, because of insurance coverage standards.  
27  
28 Therefore, most antihypertensive agents are prescribed as a 0.5 tablet or 1 tablet once  
29  
30 a day. Thus, we excluded prescriptions that were not 0.5 or 1 tablet once a day  
31  
32 (N=162,564). In addition, only those who received antihypertensive medication for at  
33  
34 least one year were selected to ensure a more objective and stable measurement of  
35  
36 medication adherence. As a result, 116,677 patients were ultimately selected for the  
37  
38 study (Figure 1). This study was approved by the institutional review board (IRB) at  
39  
40 the Seoul National University Hospital (IRB No.E-15-5-079-673) and National Health  
41  
42 Insurance review committee for research support (NHIS-2017-2-610). Written  
43  
44 informed consent was waived.  
45  
46  
47  
48  
49  
50  
51  
52  
53  
54

### 55 **Assessment of adherence**

1  
2  
3  
4 Medication adherence was calculated using the Medication Possession Ratio  
5  
6 (MPR), a frequently used indirect measurement method (5, 7, 20). MPR is calculated  
7  
8 by dividing the total days supplied (excluding supplied days for the last clinic visit) by  
9  
10 the number of days between the first and last refills (7).  
11  
12  
13  
14  
15  
16

17 MPR = total days supplied (TDS)/number of days between the first and last refills  
18  
19 (prescription period, [PP])  
20  
21  
22  
23  
24

25 The limitation of MPR is that adherence can be overestimated, because the total  
26  
27 days supplied is assumed to be the actual days the drug is used (20, 21).  
28

29 Nevertheless, MPR was used in this study, because it is considered the best method  
30  
31 to evaluate the adherence of antihypertensive agents using retrospective data (21).  
32  
33

34 Theoretically, MPR may exceed 100% if the patient visits prematurely before the  
35  
36 drug is consumed. Thus, for the purposes of this study, MPR measuring over 100%  
37  
38 was capped at 100%.  
39  
40  
41

#### 42 **Factors related to adherence**

43  
44

45 Medication adherence is determined by the interactions of factors associated with  
46  
47 the patient, condition, therapy, healthcare system, and social/economic status etc.  
48  
49 (1, 5, 7, 10). In this study, factors associated with the patient (age, sex), condition  
50  
51 (comorbidity), therapy (drug costs, number of concurrent drugs, prescription period),  
52  
53 healthcare system (insurance coverage), and social/economic status (income,  
54  
55  
56  
57  
58  
59  
60

1  
2  
3  
4 residence) were derived as the confounding variables and used in the statistical  
5  
6 analysis. Education, occupation, related symptoms, adverse effects of the treatment,  
7  
8 family and caregiver status, and medical staff factors, which are known to affect  
9  
10 adherence, were not included in the study, because they were not identifiable in the  
11  
12 NHIS-NSC (Supplementary Figure 2). In this study, comorbidities were calculated as  
13  
14 the mean number of subjects' diagnoses during the observation period. The number  
15  
16 of drugs taken was calculated as the average number of medication taken by  
17  
18 subjects during the observation period.  
19  
20  
21  
22  
23  
24  
25

## 26 **Statistical analysis**

27  
28  
29 The study subjects were divided into four groups according to the type of  
30  
31 antihypertensive drugs they were taking: the only ARB group, only CCB group, MPC  
32  
33 group, and SPC group. The average adherence of the four groups was examined.  
34  
35 Each group was assigned according to the last drug taken by the subjects to  
36  
37 categorize them without overlapping (Supplementary Figure 3). The reason for  
38  
39 dividing the group according to the last drug is that selecting last period of  
40  
41 hypertension treatment enables to attain relatively stabilized medication adherence  
42  
43 than choosing early period of hypertension treatment. Another reason is that if the  
44  
45 group is divided according to the initial drug taken, the SPC group may not be  
46  
47 selected at all. We compared the average adherence of the four groups before and  
48  
49 after adjusting confounding factors using analysis of covariance (ANCOVA). A  
50  
51 subgroup analysis, which compared the differences in adherence of each group  
52  
53  
54  
55  
56  
57  
58  
59  
60

1  
2  
3  
4 according to age group (20–49 years, 50–64 years, 65–74 years, and 75 years–)  
5  
6 and number of medications, was conducted. We also compared the adherence  
7  
8 difference between MPC and SPC therapies according to the combination of an old-  
9  
10 age standard (65 years) and number of medications. Finally, a sensitivity analysis of  
11  
12 age and the number of medications affecting differences in adherence was  
13  
14 conducted. All analyses were conducted by using STATA version 14.0(Stata Corp.,  
15  
16 College Station, TX, USA) and P-values less than 0.05 were regarded as statistically  
17  
18 significant.  
19  
20  
21  
22  
23  
24  
25  
26  
27  
28  
29  
30  
31  
32  
33  
34  
35  
36  
37  
38  
39  
40  
41  
42  
43  
44  
45  
46  
47  
48  
49  
50  
51  
52  
53  
54  
55  
56  
57  
58  
59  
60

## Results

### Baseline characteristics

Of the 116,677 subjects, 29,400 were in the only ARB group, 58,401 in the only CCB group, 10,458 in the MPC group, and 18,418 in the SPC group. Among all subjects, 47.3% were male and 52.7% female. Most subjects were aged in their 60s, followed by those in their 50s, 70s, and 40s. Subjects had an average of three to four diagnoses, and were taking an average number of four medications (three to four drugs were the most common, followed by four to five) (Table 1).

### Adherence comparison

The crude mean (mean± standard deviation, [SD]) of MPR for each group was 81.0±23.9% in the only ARB group, 80.9±23.2% in the only CCB group, 85.3±19.6% in the MPC group, and 87.7±17.7% in the SPC group. The adjusted MPR was 81.6% (95% confidence interval, [CI] 81.3-81.9) in the only ARB group, 79.7% (95% CI 79.5-79.9) in the only CCB group, 87.2% (95% CI 86.7-87.7) in the MPC group, and 89.7% (95% CI 89.3-90.0%) in the SPC group. Regardless of the adjustment, medication adherence was higher in the combination therapy than monotherapy group, and adherence of the SPC was higher than that of the MPC when comparing combination therapy ( $p<0.05$ ) (Table 2). The adherence difference between the SPC and MPC groups was more significant as age and the number of drugs taken increased. The adherence difference between the two groups started to increase

1  
2  
3  
4 when the number of medications was at 5-6, and further widened when the number  
5  
6 of drugs increased ( $p<0.05$ ) (Table 2). The adherence difference between the MPC  
7  
8 and monotherapy groups began to decrease when the number of medications was at  
9  
10 7-8 and there was simply no difference between them when the number of total  
11  
12 drugs taken were nine or more. However the difference between the SPC and  
13  
14 monotherapy groups remained high (Table 2, Figure 2).  
15  
16  
17  
18  
19  
20

### 21 **Subgroup analysis**

22  
23  
24 The number of medications and adherence was analyzed by dividing subjects into  
25  
26 an elderly and non-elderly group (cut-off age: 65 years). Regardless of the elderly  
27  
28 status, the adherence difference between the SPC and MPC groups increased when  
29  
30 the number of drugs increased. The adherence difference started to increase  
31  
32 significantly when the number of drugs taken was at 3–4 in the elderly group (aged  
33  
34 65 years and over) and 5–6 in the non-elderly group (aged 20–64 years) ( $p<0.05$ )  
35  
36 (Figure 3). As a result of the sensitivity analysis based on the number of drugs per  
37  
38 detailed age group (20–49 years, 50–64 years, 65–74 years, and 75 years–), the  
39  
40 same tendency emerged for overall medication adherence. The 20–49 years age  
41  
42 group and those aged more than 75 years, a relatively small number of samples,  
43  
44 demonstrated a similar tendency, but were borderline significant (Table 3).  
45  
46  
47  
48  
49  
50  
51  
52  
53  
54  
55  
56  
57  
58  
59  
60

## Discussion

1  
2  
3 First, among the 1,048,061 patients enrolled in the NHIS-NSC from 2008 to 2013,  
4 206,739 were diagnosed with hypertension, a prevalence of 19.7%. This differs  
5  
6 somewhat from the 23.7% prevalence of hypertension in Korea, as reported by the  
7  
8 Korean Centers for Disease Control and Prevention in 2013 (22). The reason for this  
9  
10 difference seems to be that some people do not visit the hospital, even when  
11  
12 diagnosed with hypertension. In fact, according to the Korean National Health and  
13  
14 Nutrition Examination Survey (KNHANES) in 2013, the hypertension unawareness  
15  
16 rate in Korea is 38.5% and untreated rate 34.7% (22). Considering these values, the  
17  
18 prevalence of hypertension in the sample of this study is similar to the prevalence in  
19  
20 Korea. Thus, the data used in this study can be considered a representative sample  
21  
22 reflecting the characteristics of the whole population without bias. Comparing these  
23  
24 rates with other countries, the unawareness and untreated rates of hypertension for  
25  
26 2007–2010 in the United States were 18.9% and 26% respectively (23). In England  
27  
28 in 2006, the unawareness rate was 34.7% and untreated rate 48.7% (24). In  
29  
30 Canada, the unawareness rate was 16.7% and untreated rate 20.1 % in the period  
31  
32 2007–2009 (24). These statistics indicate that the prevalence of hypertension  
33  
34 identified in hospital is slightly lower than the overall prevalence, suggesting the  
35  
36 same tendency as that found in this study.  
37  
38  
39  
40  
41  
42  
43  
44

45 In this study, the comparison of medication adherence of the four groups showed  
46  
47 that adherence in combination therapy was higher than that for monotherapy. These  
48  
49 results can be explained by applying the Health Belief Model (25, 26). Those who  
50  
51 think that the severity of their hypertension is higher (e.g., by being prescribed  
52  
53 combination therapy), are more likely to try to maintain adequate blood pressure by  
54  
55  
56



1 taking antihypertensive agents as prescribed (27, 28). Schulz et al. found that when  
2 prescribing antihypertensive agents such as angiotensin converting enzyme  
3 inhibitors, ARB, Beta blockers, and CCB with diuretics as SPC therapy, patients'  
4 non-persistent risk was 8.4% lower and the possibility of non-adherence 19.4% lower  
5 than when prescribing these drugs as monotherapy without diuretics (29). Patel et al.  
6 also reported that patients with SPC therapy including Hydrochlorothiazide (HCTZ)  
7 demonstrated higher adherence than those using HCTZ monotherapy (30). Patel's  
8 study did not include subjects' baseline blood pressure information, but assumed  
9 that the monotherapy group was in early stage hypertension (30). In addition, Van  
10 Wijik et al. reported that the group that had initiated hypertension treatment with  
11 combination therapy had higher drug persistence than the group that started with  
12 monotherapy. Furthermore, they assumed that the reason for the higher persistence  
13 for the combination therapy group was related to the severity of the disease (31).  
14 Another study by Hashmi et al. reported that the average adherence of hypertensive  
15 patients when treated with monotherapy was 79%, 87% when treated with two  
16 drugs, and 90% when treated with three or more drugs (32). They also suggested  
17 that these results might be related to patients' increased awareness, because of their  
18 hypertension severity. As such, patients treated with combination therapy may be  
19 more adherent, because they are more likely to take medication with greater  
20 awareness than people treated with a single agent, since their hypertension is more  
21 severe.

22  
23  
24  
25  
26  
27  
28  
29  
30  
31  
32  
33  
34  
35  
36  
37  
38  
39  
40  
41  
42  
43  
44  
45  
46  
47  
48  
49 In this study, the medication adherence of the SPC group was higher than that of  
50 the MPC group, as in previous research (11-15). A meta-analysis by Gupta et al.,  
51 which compared antihypertensive medication adherence between SPC and MPC  
52  
53  
54  
55  
56

1 prescriptions, confirmed the significantly higher adherence of the SPC group than  
2 the MPC group in all three cohort studies and two trials. [Odds ratio: 1.21(95% CI:  
3 1.03 to 1.43)] (12). Sherrill et al. also performed a meta-analysis of seven studies  
4 that compared adherence between two groups using MPR. All seven studies  
5 reported significantly higher adherence in the SPC than MPC group, regardless of  
6 experience of antihypertensive agents (13).  
7  
8  
9  
10  
11  
12

13  
14 Furthermore, previous studies comparing medication adherence to an SPC and  
15 MPC of ARB/CCB regimen, such as this study, indicated the same results (14, 15).  
16 In a study using pharmacy claims data by Zeng et al., the proportion of good  
17 adherence in the ARB/CCB SPC group was 45.9%, higher than the 35.3% of the  
18 MPC group (14). However, their study had fewer subjects and shorter observation  
19 periods, and only included two types of ARB/CCB compound pills for the SPC group  
20 (14). A real-world study by Basner et al. reported that the adherence of the  
21 ARB/CCB SPC group was higher than the MPC group [Odds ratio: 1.38, 95% CI:  
22 (1.24, 1.53)] (15). However, although Basner's study was set in the real-world, like  
23 this one, the sample size was small, including only 3,259 subjects and short-term  
24 observation for two years. Regarding drug type, they included various types of  
25 ARB/CCB for the MPC group, but limited the SPC group's drug type to the  
26 valsartan/amlodipine compound (15). Compared to the two studies mentioned  
27 above, the current study may have confirmed the differences in adherence between  
28 SPC and MPC prescriptions by analyzing long-term adherence for all ARBs, CCBs,  
29 and ARB/CCB compounds available during the period of observation using more  
30 systematic and representative large-scale data.  
31  
32  
33  
34  
35  
36  
37  
38  
39  
40  
41  
42  
43  
44  
45  
46  
47  
48  
49  
50  
51  
52

53  
54 In addition, this study revealed that the higher the age, the greater the difference in  
55  
56

1 adherence between the SPC and MPC groups (Table 2, Figure 2). According to  
2 Salas et al., cognitive impairment is a factor in decreasing adherence to  
3 antihypertensive medication in isolated patients (33). Moreover, according to  
4 Schwartz et al., the rate of drug use errors in patients aged more than 75 years was  
5 higher than those of patients younger than 75 years (34). Presumably, it would be  
6 more difficult for the elderly to take both drugs accurately without withdrawing when  
7 taking MPC, since the frequency of decline in both physical and cognitive functions is  
8 higher in older age (33, 35). In this regard, as the patient's age increases,  
9 prescribing SPC, which simplifies the complexity of the medication regimen, may be  
10 more beneficial in increasing adherence, because for MPC prescriptions, compliance  
11 is reduced even if only one of two drugs is omitted.  
12  
13  
14  
15  
16  
17  
18  
19  
20  
21  
22  
23  
24  
25

26 We also confirmed that the greater the number of drugs taken, the greater the  
27 difference in adherence between the SPC and MPC groups (Table 2, Figure 2). The  
28 reason for this tendency is that patients on MPC need to take two drugs separately;  
29 thus, additional medication increases the complexity to a greater extent than when  
30 an SPC is taken. Toh et al. reported that a complex medication regimen such as  
31 multiple doses per day and multiple medications was significantly associated with  
32 higher non-compliance and readmissions (36). In addition, Pasina et al. reported that  
33 for the elderly aged more than 65 years hospitalized in internal medicine wards, the  
34 greater the number of prescription drugs at discharge, the lower the medication  
35 adherence and understanding of the purpose of medication (37). Therefore,  
36 prescribing an SPC regimen would be one way to increase medication adherence,  
37 especially of patients taking a large number of medications.  
38  
39  
40  
41  
42  
43  
44  
45  
46  
47  
48  
49  
50  
51  
52  
53

54 Finally, comparing the adherence difference between the SPC and MPC groups  
55  
56

1 according to both age and number of medications, there was a dose-response  
2 relationship tendency in which the more the number of drugs, the more prominent  
3 the difference regardless of age. However, this tendency started to be significant  
4 when number of drugs taking was three or more in the elderly group (aged 65 years  
5 and over) and five or more in the non-elderly group (aged 20–64 years) (Figure 3).  
6  
7 Thus, the number of drugs affecting medication complexity showed a slight  
8 difference between the elderly and non-elderly group. The significant point of the  
9 number of medications, namely the significant point when the adherence difference  
10 between SPC and MPC becomes statistically significant, was slightly different  
11 between the detailed age groups, but the tendency remained the same (Table 3).  
12  
13 The reason for this difference is that it is more difficult for older patients to adapt to  
14 regimen complexity, because of impaired physical and cognitive functions mentioned  
15 above (33, 35).  
16  
17

18  
19 Our study is meaningful for two reasons. First, we analyzed the adherence of  
20 antihypertensive agents by using a sample of national cohort data samples that  
21 represents about 2.2% of the total population. Second, we analyzed the differences  
22 in medication adherence using cohort subjects who continued to take  
23 antihypertensive medication for at least one year for the maximum of six observed  
24 years. Although previous research analyzed medication adherence between the  
25 SPC and MPC of antihypertensive agents, (11-15) they were either short-term  
26 studies or analyzed in certain centers or under limited conditions. In addition, this  
27 study is meaningful, because it compared not only adherence to a combination  
28 therapy regimen type, but also compared it to monotherapy. Furthermore, we  
29 investigated the all prescription cases and average number of associated diseases,  
30  
31  
32  
33  
34  
35  
36  
37  
38  
39  
40  
41  
42  
43  
44  
45  
46  
47  
48  
49  
50  
51  
52  
53  
54  
55  
56

1 which enabled us to more objectively adjust the factors associated with therapy and  
2 the condition.  
3

4  
5 On the other hand, this study did not reflect diverse socioeconomic factors such as  
6 education level and occupation, because of data limitations, and did not include  
7 specific factors such as caregiver status, the family environment, and healthcare  
8 provider factors. We also did not include antihypertensive agents other than ARB  
9 and CCB (e.g., diuretics, beta blockers, etc.) in the analysis. However, since the  
10 same class of drugs is homogenous, we were able to focus on comparing the  
11 adherence between SPC and MPC by eliminating the effects of drug class other than  
12 ARB and CCB, which affects adherence. Last, there is a weakness regarding  
13 adjusting for patients' comorbidities in the analysis. This study did not specify  
14 comorbidities according to severity, and only adjusted with the average number of  
15 diagnoses of the subject during the observation period. In fact, some patients are  
16 diagnosed with many mild diseases, while others have few diagnoses but more  
17 severe diseases. It is expected that further analysis that considers these factors will  
18 lead to more meaningful results in the near future.  
19  
20  
21  
22  
23  
24  
25  
26  
27  
28  
29  
30  
31  
32  
33  
34  
35  
36

37  
38 In conclusion, those taking antihypertensive drugs as a combination therapy  
39 demonstrated higher adherence than those taking them as a monotherapy. Among  
40 the combination therapy patients, those on the SPC regimen demonstrated higher  
41 adherence than those taking the MPC prescription. This tendency was more  
42 pronounced with increasing age and the number of drugs taken. Therefore, if  
43 patients are older or taking numerous medications, prescribing antihypertensive  
44 agents as a SPC regimen may help improve medication adherence.  
45  
46  
47  
48  
49  
50  
51  
52  
53  
54

55 **Contributors:** SJ Kim conceived and designed the study, acquired and analyzed the data, interpreted  
56

1 the study findings, and drafted the manuscript. OD Kwon analyzed the data, interpreted the study  
2 findings. SW oh, CM Lee, and BL Cho critically reviewed the manuscript. HC Choi conceived and  
3 designed the study, supervised and directed the conduct of the study, interpreted the study findings,  
4 and critically revised the manuscript. All authors had full access to all of the data and the accuracy of  
5 the data analysis. The corresponding author attests that all listed authors meet authorship criteria and  
6 that no other meeting the criteria have been omitted. HC Choi is the guarantor.  
7  
8  
9

10  
11 **Funding:** None  
12

13 **Competing Interests:** All authors have completed the ICMJE uniform disclosure form at  
14 [www.icmje.org/coi\\_disclosure.pdf](http://www.icmje.org/coi_disclosure.pdf) and declare: None of the authors reported disclosures.  
15  
16

17 **Patient consent for publication:** Not required.  
18

19 **Ethics approval:** This study was approved by the institutional review board (IRB) at the Seoul National  
20 University Hospital (IRB No.) and National Health Insurance review committee for research support  
21 (NHIS-2017-2-610). Written informed consent was waived.  
22  
23

24 **Data sharing:** Data are from the National Health Insurance service (NHIS). Interested researchers can  
25 request access to the data from NHIS. The detailed information for data access of NHIS could be  
26 obtained from the NHIS website ([www.nhis.or.kr](http://www.nhis.or.kr)).  
27  
28  
29  
30  
31  
32  
33  
34  
35  
36  
37  
38  
39  
40  
41  
42  
43  
44  
45  
46  
47  
48  
49  
50  
51  
52  
53  
54  
55  
56  
57  
58  
59  
60

## References

1. Sabaté E. Adherence to long-term therapies: evidence for action: World Health Organization; 2003.
2. Simpson SH, Eurich DT, Majumdar SR, Padwal RS, Tsuyuki RT, Varney J, Johnson AJ. A meta-analysis of the association between adherence to drug therapy and mortality. *Bmj*. 2006;333(7557):15.
3. Shin S, Song H, Oh S-K, Choi KE, Kim H, Jang S. Effect of antihypertensive medication adherence on hospitalization for cardiovascular disease and mortality in hypertensive patients. *Hypertension Research*. 2013;36(11):1000.
4. Hong JS, Kang HC. Relationship between oral antihyperglycemic medication adherence and hospitalization, mortality, and healthcare costs in adult ambulatory care patients with type 2 diabetes in South Korea. *Medical care*. 2011;378-84.
5. Ho PM, Bryson CL, Rumsfeld JS. Medication adherence: its importance in cardiovascular outcomes. *Circulation*. 2009;119(23):3028-35.
6. Marcum ZA, Sevick MA, Handler SM. Medication nonadherence: a diagnosable and treatable medical condition. *Jama*. 2013;309(20):2105-6.
7. Iuga AO, McGuire MJ. Adherence and health care costs. Risk management and healthcare policy. 2014;7:35.
8. Osterberg L, Blaschke T. Adherence to medication. *New England Journal of Medicine*. 2005;353(5):487-97.
9. Park J-H, Shin Y, Lee S-Y, Lee SI. Antihypertensive drug medication adherence and its affecting factors in South Korea. *International journal of cardiology*. 2008;128(3):392-8.
10. Tajouri TH, Driver SL, Holmes Jr DR. 'Take as directed'—strategies to improve adherence to cardiac medication. *Nature Reviews Cardiology*. 2014;11(5):304.
11. Bangalore S, Kamalakkannan G, Parkar S, Messerli FH. Fixed-dose combinations improve medication compliance: a meta-analysis. *The American journal of medicine*. 2007;120(8):713-9.
12. Gupta AK, Arshad S, Poulter NR. Compliance, safety, and effectiveness of fixed-dose combinations of antihypertensive agents: a meta-analysis. *Hypertension*. 2010;55(2):399.
13. Sherrill B, Halpern M, Khan S, Zhang J, Panjabi S. Single-pill vs free-equivalent combination therapies for hypertension: a meta-analysis of health care costs and adherence. *The Journal of Clinical Hypertension*. 2011;13(12):898-909.
14. Zeng F, Patel B, Andrews L, Frech-Tamas F, Rudolph A. Adherence and persistence of single-pill ARB/CCB combination therapy compared to multiple-pill ARB/CCB regimens. *Current medical research and opinion*. 2010;26(12):2877-87.
15. Baser O, Andrews L, Wang L, Xie L. Comparison of real-world adherence, healthcare resource utilization and costs for newly initiated valsartan/amlodipine single-pill combination versus angiotensin receptor blocker/calcium channel blocker free-combination therapy. *Journal of medical economics*. 2011;14(5):576-83.
16. Lee J, Lee JS, Park S-H, Shin SA, Kim K. Cohort profile: the national health insurance service—national sample cohort (NHIS-NSC), South Korea. *International journal of epidemiology*. 2016;46(2):e15-e.
17. Xu H, He Y, Xu L, Yan X, Dai H. Trends and patterns of five antihypertensive drug classes between 2007 and 2012 in China using hospital prescription data. *International journal of clinical pharmacology and therapeutics*. 2015;53(6):430-7.
18. Ishida T, Oh A, Hiroi S, Shimasaki Y, Tsuchihashi T. Current use of antihypertensive drugs in Japanese patients with hypertension: Analysis by age group. *Geriatrics & gerontology international*. 2018.
19. Organization WH. The anatomical therapeutic chemical classification system with defined daily doses (ATC/DDD). Oslo: WHO. 2006.
20. Andrade SE, Kahler KH, Frech F, Chan KA. Methods for evaluation of medication adherence and persistence using automated databases. *Pharmacoepidemiology and drug safety*. 2006;15(8):565-74.
21. Halpern MT, Khan ZM, Schmier JK, Burnier M, Caro JJ, Cramer J, Daley WL, Gurwitz J, Hollenberg NK. Recommendations for evaluating compliance and persistence with hypertension therapy using retrospective data. American Heart Association, Inc.; 2006.
22. Statistics Korea, The 2013 report of the Korea National Health and Nutrition Examination Survey. Available at: <http://knhanes.cdc.go.kr>



23. Egan BM, Zhao Y, Axon RN. US trends in prevalence, awareness, treatment, and control of hypertension, 1988-2008. *Jama*. 2010;303(20):2043-50.
24. Joffres M, Falaschetti E, Gillespie C, Robitaille C, Loustalot F, Poulter N, McAlister FA, Johansen H, Baclic O, Campbell N. Hypertension prevalence, awareness, treatment and control in national surveys from England, the USA and Canada, and correlation with stroke and ischaemic heart disease mortality: a cross-sectional study. *BMJ open*. 2013;3(8):e003423.
25. Rosenstock IM, Strecher VJ, Becker MH. Social learning theory and the health belief model. *Health education quarterly*. 1988;15(2):175-83.
26. Rosenstock IM. Why people use health services. *The Milbank Quarterly*. 2005;83(4):Online-only-Online-only.
27. Billups SJ, Malone DC, Carter BL. The relationship between drug therapy noncompliance and patient characteristics, health-related quality of life, and health care costs. *Pharmacotherapy: The Journal of Human Pharmacology and Drug Therapy*. 2000;20(8):941-9.
28. Shalansky SJ, Levy AR. Effect of number of medications on cardiovascular therapy adherence. *Annals of Pharmacotherapy*. 2002;36(10):1532-9.
29. Schulz M, Krueger K, Schuessel K, Friedland K, Laufs U, Mueller WE, Ude M. Medication adherence and persistence according to different antihypertensive drug classes: a retrospective cohort study of 255,500 patients. *International journal of cardiology*. 2016;220:668-76.
30. Patel BV, Remigio-Baker RA, Thiebaud P, Preblick R, Plauschinat C. Improved persistence and adherence to diuretic fixed-dose combination therapy compared to diuretic monotherapy. *BMC family practice*. 2008;9(1):61.
31. Van Wijk BL, Klungel OH, Heerdink ER, de Boer A. Rate and determinants of 10-year persistence with antihypertensive drugs. *Journal of hypertension*. 2005;23(11):2101-7.
32. Hashmi SK, Afridi MB, Abbas K, Sajwani RA, Saleheen D, Frossard PM, Ishaq M, Ambreen A, Ahmad U. Factors associated with adherence to anti-hypertensive treatment in Pakistan. *PloS one*. 2007;2(3):e280.
33. Salas M, In't Veld BA, van der Linden PD, Hofman A, Breteler M, Stricker BH. Impaired cognitive function and compliance with antihypertensive drugs in elderly: the Rotterdam Study. *Clinical Pharmacology & Therapeutics*. 2001;70(6):561-6.
34. Schwartz D, Wang M, Zeitz L, Goss ME. Medication errors made by elderly, chronically ill patients. *American Journal of Public Health and the Nations Health*. 1962;52(12):2018-29.
35. Turner A, Hochschild A, Burnett J, Zulfiqar A, Dyer CB. High prevalence of medication non-adherence in a sample of community-dwelling older adults with adult protective services-validated self-neglect. *Drugs & aging*. 2012;29(9):741-9.
36. Toh MR, Teo V, Kwan YH, Raaj S, Tan S-YD, Tan JZY. Association between number of doses per day, number of medications and patient's non-compliance, and frequency of readmissions in a multi-ethnic Asian population. *Preventive medicine reports*. 2014;1:43-7.
37. Pasina L, Brucato A, Falcone C, Cucchi E, Bresciani A, Sottocorno M, Taddei GC, Casati M, Franchi C, Djade CD, Nobili A. Medication non-adherence among elderly patients newly discharged and receiving polypharmacy. *Drugs & aging*. 2014;31(4):283-9.



**Table 1 Baseline characteristics (n=116,677)**

|                                            | Only ARB group<br>N(%) or mean±SD | Only CCB group<br>N(%) or mean±SD | MPC group<br>N(%) or mean±SD | SPC group<br>N(%) or mean±SD |
|--------------------------------------------|-----------------------------------|-----------------------------------|------------------------------|------------------------------|
| Total                                      | 29,400 (25.2%)                    | 58,401 (50.0%)                    | 10,458 (9.0%)                | 18,418 (15.8%)               |
| Male(47.3%, n=55,210)                      | 13,834                            | 25,499                            | 5,507                        | 10,370                       |
| Female(52.7%, n=61,467)                    | 15,566                            | 32,902                            | 4,951                        | 8,048                        |
| Age (year)                                 | 59.3 ± 12.5                       | 62.4 ± 12.2                       | 61.1 ± 12.4                  | 56.9 ± 12.3                  |
| 20-29 (0.6%)                               | 263                               | 204                               | 48                           | 148                          |
| 30-39 (4.2%)                               | 1,426                             | 1,695                             | 417                          | 1,362                        |
| 40-49 (16.6%)                              | 5,455                             | 8,003                             | 1,653                        | 4,283                        |
| 50-59 (26.4%)                              | 8,259                             | 14,621                            | 2,681                        | 5,212                        |
| 60-69 (27.7%)                              | 7,761                             | 17,177                            | 2,944                        | 4,475                        |
| 70-79 (19.0%)                              | 4,997                             | 12,604                            | 2,138                        | 2,412                        |
| >=80 (5.5%)                                | 1,239                             | 4,097                             | 577                          | 526                          |
| Income                                     |                                   |                                   |                              |                              |
| Low (33.8%)                                | 9,396                             | 20,277                            | 3,646                        | 6,063                        |
| Middle (25.6%)                             | 7,304                             | 15,081                            | 2,647                        | 4,868                        |
| High (40.6%)                               | 12,700                            | 23,043                            | 4,165                        | 7,487                        |
| Residence                                  |                                   |                                   |                              |                              |
| Metropolitan (46.1%)                       | 13,711                            | 26,482                            | 4,771                        | 8,874                        |
| City (44.1%)                               | 12,878                            | 25,946                            | 4,670                        | 7,913                        |
| Rural (9.8%)                               | 2,811                             | 5,973                             | 1,017                        | 1,631                        |
| Health insurance                           |                                   |                                   |                              |                              |
| National Health Insurance (94.2%)          | 27,679                            | 55,113                            | 9,662                        | 17,406                       |
| Medical aid (5.8%)                         | 1,721                             | 3,288                             | 796                          | 1,012                        |
| Average No. of diagnoses                   | 3.6 ± 1.9                         | 3.1 ± 1.8                         | 3.6 ± 1.9                    | 3.1 ± 1.7                    |
| Average No. of medications                 | 4.1 ± 2.2                         | 3.9 ± 2.0                         | 4.9 ± 2.1                    | 3.7 ± 2.0                    |
| Average cost of anti-hypertension drug (¥) | 651 ± 185                         | 413 ± 141                         | 982 ± 316                    | 824 ± 196                    |
| Prescription period (day)                  | 1,174 ± 575                       | 1,477 ± 603                       | 1,164 ± 560                  | 972 ± 412                    |
| Total days supplied (day)                  | 954 ± 562                         | 1,218 ± 629                       | 1,000 ± 545                  | 855 ± 407                    |
| Medication possession ratio (MPR)          | 81.0±23.9                         | 80.9 ± 23.2                       | 85.3 ± 19.6                  | 87.7 ± 17.7                  |

1 ARB, angiotensin II receptor blockers; CCB, calcium channel blockers; SPC, single pill combination;  
2 MPC, multiple pill combination; SD, standard deviation  
3  
4  
5  
6  
7  
8  
9  
10  
11  
12  
13  
14  
15  
16  
17  
18  
19  
20  
21  
22  
23  
24  
25  
26  
27  
28  
29  
30  
31  
32  
33  
34  
35  
36  
37  
38  
39  
40  
41  
42  
43  
44  
45  
46  
47  
48  
49  
50  
51  
52  
53  
54  
55  
56  
57  
58  
59  
60

For peer review only

**Table 2 Medication adherences according to age and numbers of medications**

|                            | Only ARB group<br>(n=29,400) |                                   | Only CCB group<br>(n=58,401) |                                   | MPC group<br>(n=10,458) |                                   | SPC group<br>(n=18,418) |                                   | p value† | MPR<br>Differences‡ | p value§ |
|----------------------------|------------------------------|-----------------------------------|------------------------------|-----------------------------------|-------------------------|-----------------------------------|-------------------------|-----------------------------------|----------|---------------------|----------|
|                            | Crude<br>MPR mean            | Adjusted<br>MPR mean*<br>(95% CI) | Crude<br>MPR mean            | Adjusted<br>MPR mean*<br>(95% CI) | Crude<br>MPR mean       | Adjusted<br>MPR mean*<br>(95% CI) | Crude<br>MPR mean       | Adjusted<br>MPR mean*<br>(95% CI) |          |                     |          |
|                            | 81.0                         | 81.6 (81.3-81.9)                  | 80.9                         | 79.7 (79.5-79.9)                  | 85.3                    | 87.2 (86.7-87.7)                  | 87.7                    | 89.7 (89.3-90.0)                  | <0.01    | 2.5                 | <0.01    |
| Age group (n=116,677)      |                              |                                   |                              |                                   |                         |                                   |                         |                                   |          |                     |          |
| 20-49y (n=24,957)          | 77.6                         | 77.9 (77.3-78.4)                  | 77.4                         | 76.1 (75.5-76.7)                  | 83.1                    | 84.9 (83.7-86.0)                  | 83.7                    | 85.1 (84.4-85.8)                  | <0.01    | 0.2                 | 0.20     |
| 50-64y (n=46,085)          | 82.6                         | 83.0 (82.6-83.4)                  | 82.9                         | 81.9 (81.5-82.2)                  | 86.4                    | 88.0 (87.2-88.8)                  | 89.3                    | 90.8 (90.3-91.4)                  | <0.01    | 2.8                 | <0.01    |
| 65-74y (n=30,652)          | 82.4                         | 83.0 (82.5-83.5)                  | 82.3                         | 81.4 (81.0-81.8)                  | 86.5                    | 88.1 (87.1-89.0)                  | 90.6                    | 92.3 (91.5-93.0)                  | <0.01    | 4.2                 | <0.01    |
| >=75y (n=14,983)           | 79.3                         | 80.1 (79.3-81.0)                  | 77.4                         | 76.6 (76.0-77.1)                  | 83.3                    | 84.8 (83.3-86.3)                  | 87.5                    | 89.3 (88.0-90.7)                  | <0.01    | 4.5                 | <0.01    |
| Average No. of medications |                              |                                   |                              |                                   |                         |                                   |                         |                                   |          |                     |          |
| No.=1-2 (n=19,523)         | 79.6                         | 80.3 (79.6-80.9)                  | 79.4                         | 78.1 (77.4-78.7)                  | 85.8                    | 87.6 (85.2-90.0)                  | 85.9                    | 87.9 (87.0-88.9)                  | <0.01    | 0.3                 | 0.68     |
| No.=3-4 (n=48,388)         | 81.3                         | 82.0 (81.6-82.5)                  | 81.6                         | 80.6 (80.2-80.9)                  | 87.3                    | 88.7 (87.9-89.4)                  | 87.4                    | 89.2 (88.7-89.8)                  | <0.01    | 0.6                 | 0.99     |
| No.=5-6 (n=30,105)         | 81.9                         | 82.3 (81.9-82.8)                  | 81.4                         | 80.5 (80.1-80.9)                  | 86.4                    | 87.5 (86.7-88.4)                  | 89.3                    | 90.6 (89.9-91.3)                  | <0.01    | 3.1                 | <0.01    |
| No.=7-9 (n=13,071)         | 81.4                         | 81.6 (80.9-82.3)                  | 80.4                         | 78.9 (78.2-79.6)                  | 82.8                    | 85.3 (84.1-86.5)                  | 88.8                    | 90.9 (89.8-92.0)                  | <0.01    | 5.6                 | <0.01    |
| No.≥9 (n=5,590)            | 78.3                         | 77.9 (76.8-79.0)                  | 78.3                         | 76.3 (75.2-77.4)                  | 78.3                    | 82.5 (80.6-84.4)                  | 88.8                    | 91.2 (89.3-93.1)                  | <0.01    | 8.7                 | <0.01    |

ARB, angiotensin II receptor blockers; CCB, calcium channel blockers; SPC, single pill combination; MPC, multiple pill combination; MPR, Medication possession ratio; CI, confidence interval

\* Adjusted for factors associated with the patient (age, sex), condition (comorbidity), therapy (drug costs, number of concurrent drugs, prescription period), the healthcare system (insurance coverage), and the social/economic status (income, residence)

† p value of crude MPR mean

‡ MPR differences = adjusted MPR of SPC group – adjusted MPR of MPC group

§ p value of MPR differences.

Analyses were performed using ANCOVA

**Table 3 Sensitivity analysis for medication adherences according to age and numbers of medications**

|                          | Only ARB group<br>(n=29,400) |                               | Only CCB group<br>(n=58,401) |                               | MPC group<br>(n=10,458) |                               | SPC group<br>(n=18,418) |                               | p value† | MPR<br>Differences‡ | p value§ |
|--------------------------|------------------------------|-------------------------------|------------------------------|-------------------------------|-------------------------|-------------------------------|-------------------------|-------------------------------|----------|---------------------|----------|
|                          | Crude MPR<br>mean            | Adjusted MPR<br>mean* (95%CI) | Crude MPR<br>mean            | Adjusted MPR<br>mean* (95%CI) | Crude MPR<br>mean       | Adjusted MPR<br>mean* (95%CI) | Crude MPR<br>mean       | Adjusted MPR<br>mean* (95%CI) |          |                     |          |
| <b>20-49y (n=24,957)</b> |                              |                               |                              |                               |                         |                               |                         |                               |          |                     |          |
| No.=1-2 (n=6,827)        | 76.7                         | 76.6 (75.6-77.6)              | 75.8                         | 74.7 (73.4-76.0)              | 82.3                    | 84.1 (80.2-88.0)              | 83.4                    | 84.8 (83.4-86.1)              | <0.01    | 0.7                 | 0.78     |
| No.=3-4 (n=11,768)       | 78.2                         | 78.5 (77.6-79.3)              | 78.6                         | 77.5 (76.8-78.3)              | 85.6                    | 86.7 (85.2-88.2)              | 83.9                    | 85.1 (84.1-86.1)              | <0.01    | -1.6                | 0.01     |
| No.=5-6 (n=4,595)        | 78.1                         | 78.6 (77.4-79.8)              | 76.7                         | 75.3 (74.0-76.6)              | 82.2                    | 83.9 (81.6-86.3)              | 84.2                    | 85.3 (83.5-87.0)              | <0.01    | 1.3                 | 0.70     |
| No.=7-9 (n=1,360)        | 79.4                         | 79.3 (76.9-81.2)              | 77.5                         | 76.7 (74.1-79.4)              | 76.7                    | 78.6 (74.5-82.7)              | 81.9                    | 82.4 (79.0-85.8)              | <0.01    | 3.8                 | 0.13     |
| No.≥9 (n=407)            | 68.7                         | 67.1 (62.6-71.6)              | 72.4                         | 68.0 (63.1-73.0)              | 73.2                    | 81.4 (74.0-88.8)              | 86.5                    | 89.8 (82.4-97.1)              | <0.01    | 8.4                 | 0.05     |
| <b>50-64y (n=46,085)</b> |                              |                               |                              |                               |                         |                               |                         |                               |          |                     |          |
| No.=1-2 (n=7,933)        | 81.8                         | 81.9 (81.0-82.9)              | 81.4                         | 81.0 (80.1-81.9)              | 88.9                    | 89.2 (85.6-92.9)              | 88.5                    | 89.3 (87.8-90.7)              | <0.01    | 0.1                 | 0.45     |
| No.=3-4 (n=20,396)       | 82.5                         | 83.0 (82.4-83.6)              | 83.2                         | 82.3 (81.9-82.8)              | 88.3                    | 89.5 (88.3-90.6)              | 89.1                    | 90.4 (89.6-91.2)              | <0.01    | 0.9                 | 0.72     |
| No.=5-6 (n=11,657)       | 83.5                         | 83.7 (83.0-84.4)              | 83.8                         | 83.2 (82.6-83.9)              | 87.8                    | 88.5 (87.3-89.8)              | 90.3                    | 91.1 (90.0-92.1)              | <0.01    | 2.5                 | <0.01    |
| No.=7-9 (n=4,438)        | 83.4                         | 83.4 (82.2-84.5)              | 82.5                         | 80.4 (79.2-81.5)              | 81.9                    | 85.1 (83.1-87.1)              | 89.9                    | 92.3 (90.6-94.0)              | <0.01    | 7.2                 | <0.01    |
| No.≥9 (n=1,661)          | 79.2                         | 78.8 (76.9-80.6)              | 81.5                         | 78.7 (76.7-80.8)              | 78.2                    | 83.4 (80.3-86.4)              | 89.6                    | 91.3 (88.3-94.3)              | <0.01    | 7.9                 | <0.01    |
| <b>65-74y (n=30,652)</b> |                              |                               |                              |                               |                         |                               |                         |                               |          |                     |          |
| No.=1-2 (n=3,412)        | 81.3                         | 82.5 (80.6-84.4)              | 81.1                         | 80.3 (79.2-81.4)              | 88.8                    | 91.1 (85.5-96.8)              | 88.9                    | 91.0 (88.3-93.8)              | <0.01    | -0.1                | 0.94     |
| No.=3-4 (n=11,308)       | 83.5                         | 83.9 (83.0-84.8)              | 83.0                         | 82.5 (81.9-83.1)              | 88.7                    | 89.2 (87.5-90.9)              | 90.3                    | 91.6 (90.3-92.9)              | <0.01    | 2.4                 | 0.03     |
| No.=5-6 (n=9,267)        | 83.1                         | 83.1 (82.3-84.0)              | 82.7                         | 82.3 (81.6-83.0)              | 88.0                    | 88.3 (86.8-89.8)              | 91.5                    | 92.5 (91.2-93.8)              | <0.01    | 4.2                 | <0.01    |
| No.=7-9 (n=4,562)        | 81.3                         | 81.7 (80.5-82.9)              | 81.7                         | 80.4 (79.3-81.5)              | 85.4                    | 87.4 (85.4-89.4)              | 90.8                    | 92.5 (90.7-94.4)              | <0.01    | 5.2                 | <0.01    |
| No.≥9 (n=2,103)          | 79.8                         | 79.3 (77.5-81.1)              | 79.1                         | 77.1 (75.4-81.1)              | 78.6                    | 83.1 (79.9-86.2)              | 90.2                    | 92.5 (89.5-95.6)              | <0.01    | 9.5                 | <0.01    |
| <b>≥75y (n=14,983)</b>   |                              |                               |                              |                               |                         |                               |                         |                               |          |                     |          |
| No.=1-2 (n=1,351)        | 80.6                         | 81.0 (77.1-84.9)              | 75.7                         | 75.5 (73.8-77.3)              | 82.4                    | 83.1 (72.1-94.0)              | 85.4                    | 85.9 (80.3-91.5)              | <0.01    | 2.9                 | 0.69     |
| No.=3-4 (n=4,916)        | 79.2                         | 80.4 (78.7-82.1)              | 78.5                         | 77.9 (77.0-78.9)              | 85.2                    | 85.6 (82.6-88.6)              | 87.4                    | 88.8 (86.3-91.2)              | <0.01    | 3.2                 | 0.42     |
| No.=5-6 (n=4,586)        | 79.8                         | 80.5 (79.0-82.0)              | 77.4                         | 76.5 (75.4-77.6)              | 83.4                    | 85.2 (82.6-87.8)              | 88.7                    | 90.4 (87.9-92.8)              | <0.01    | 5.2                 | 0.01     |
| No.=7-9 (n=2,711)        | 79.3                         | 79.6 (77.9-81.4)              | 76.8                         | 75.8 (74.3-77.2)              | 83.1                    | 85.3 (82.3-88.2)              | 87.6                    | 89.4 (86.4-92.3)              | <0.01    | 4.1                 | 0.18     |
| No.≥9 (n=1,419)          | 77.8                         | 77.4 (75.1-79.7)              | 75.5                         | 74.9 (72.8-77.0)              | 80.2                    | 81.3 (77.1-85.4)              | 85.7                    | 88.6 (84.2-93.0)              | <0.01    | 7.4                 | 0.06     |

ARB,angiotensin II receptor blockers; CCB,calcium channel blockers; SPC,single pill combination; MPC,multiple pill combination; MPR, Medication possession ratio; CI, confidence interval

\* Adjusted for factors associated with the patient (age, sex), condition (comorbidity), therapy (drug costs, number of concurrent drugs, prescription period), the healthcare system (insurance coverage), and the

1  
2  
3  
4 social/economic status (income, residence)  
5

6  
7 † p value of crude MPR mean  
8

9 ‡ MPR differences = adjusted MPR of SPC group – adjusted MPR of MPC group  
10

11  
12 § p value of MPR differences.  
13

14 Analyses were performed using ANCOVA  
15  
16  
17  
18  
19  
20  
21  
22  
23  
24  
25  
26  
27  
28  
29  
30  
31  
32  
33  
34  
35  
36  
37  
38  
39  
40  
41  
42  
43  
44  
45  
46  
47  
48  
49  
50  
51  
52  
53  
54  
55  
56  
57  
58  
59  
60

For peer review only

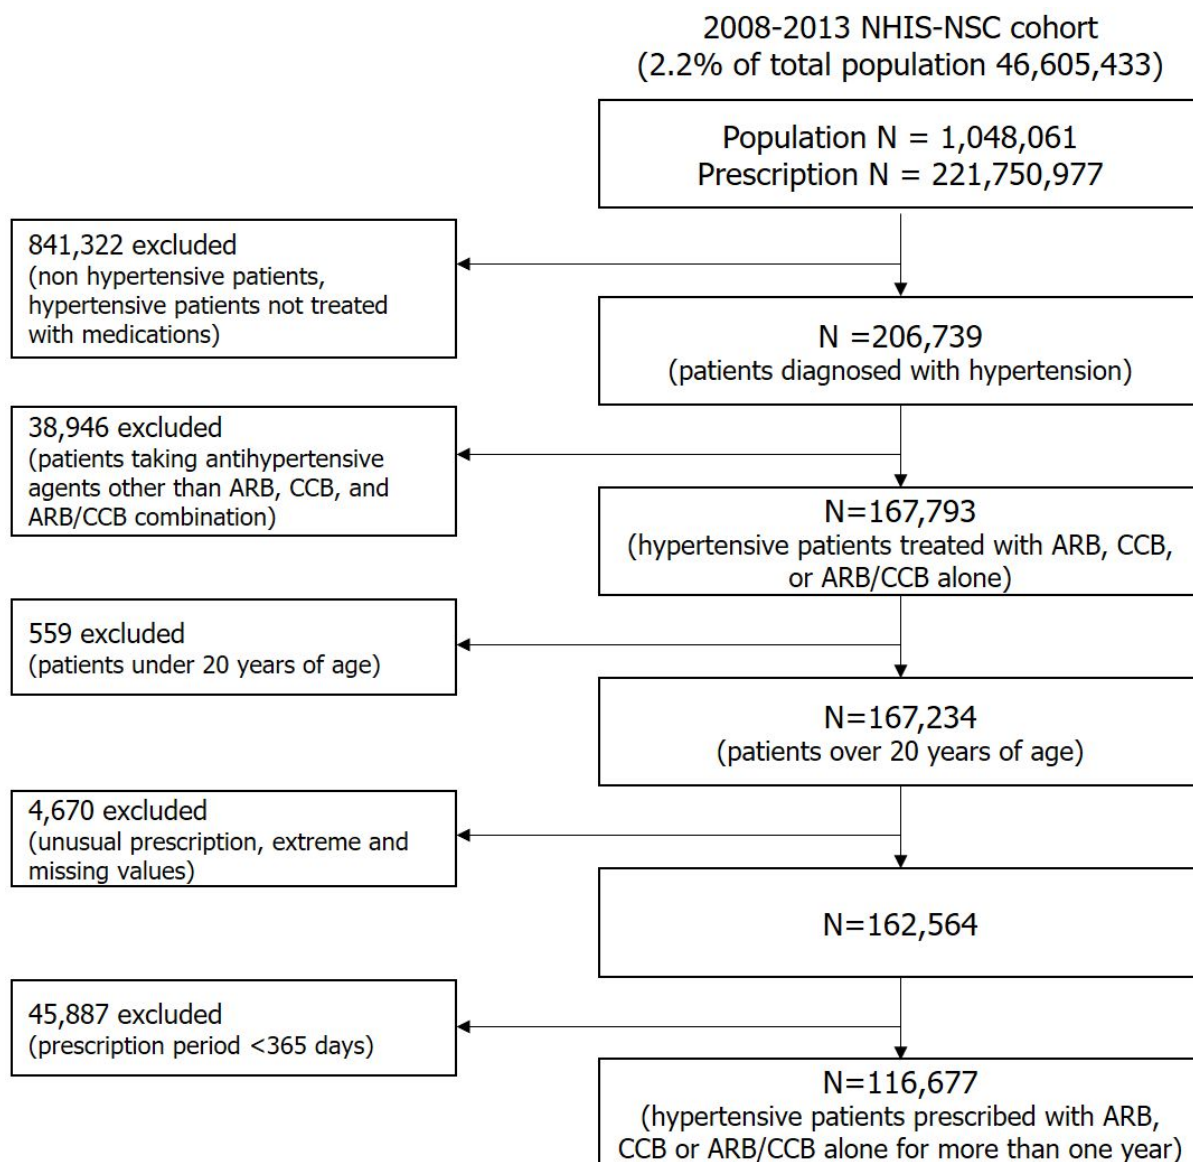

**Figure 1** Study population and data collection

ARB (angiotensin II receptor blockers), CCB (calcium channel blockers), MPC (multiple pill combination), SPC (single pill combination)

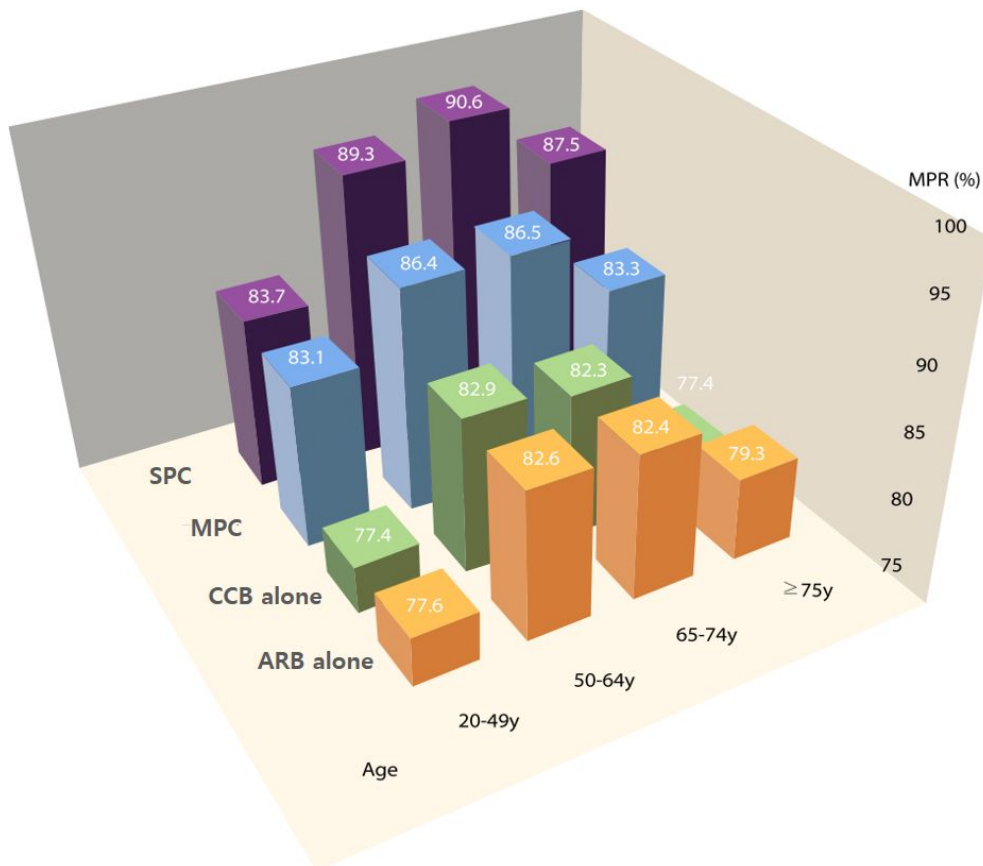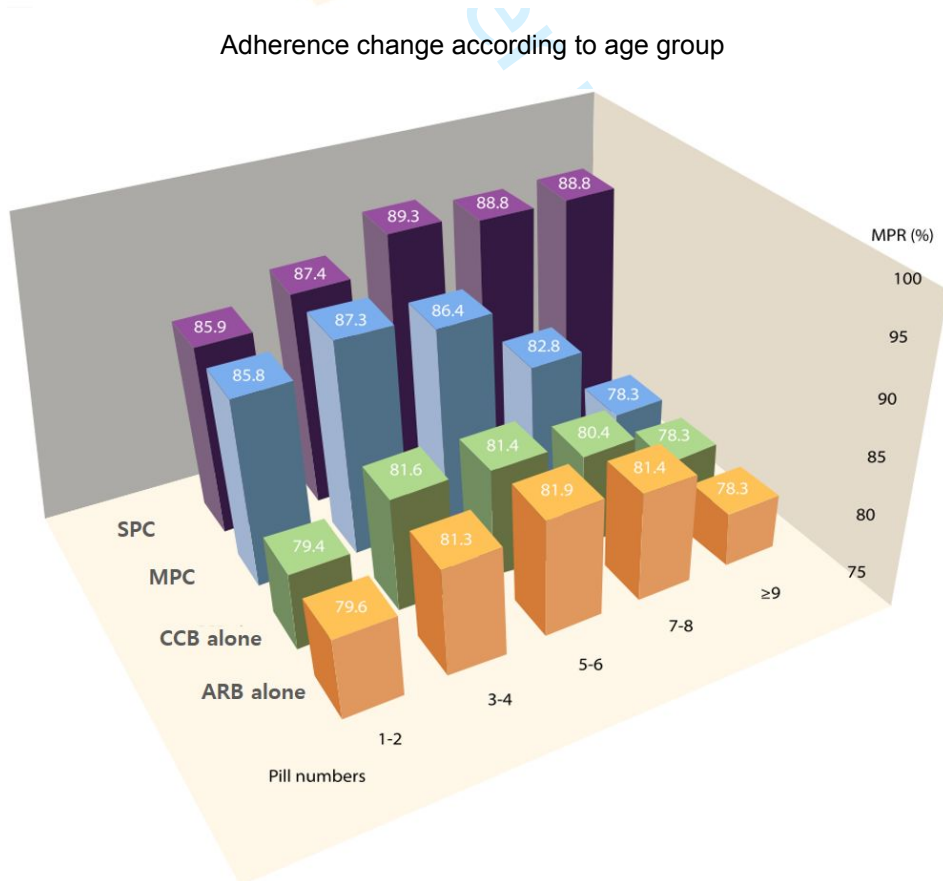

**Figure 2** Trends of medication adherences according to age group and the number of medications

MPC (multiple pill combination), SPC (single pill combination), MPR (medication possession ratio),  
ARB (angiotensin II receptor blockers), CCB (calcium channel blockers)

For peer review only



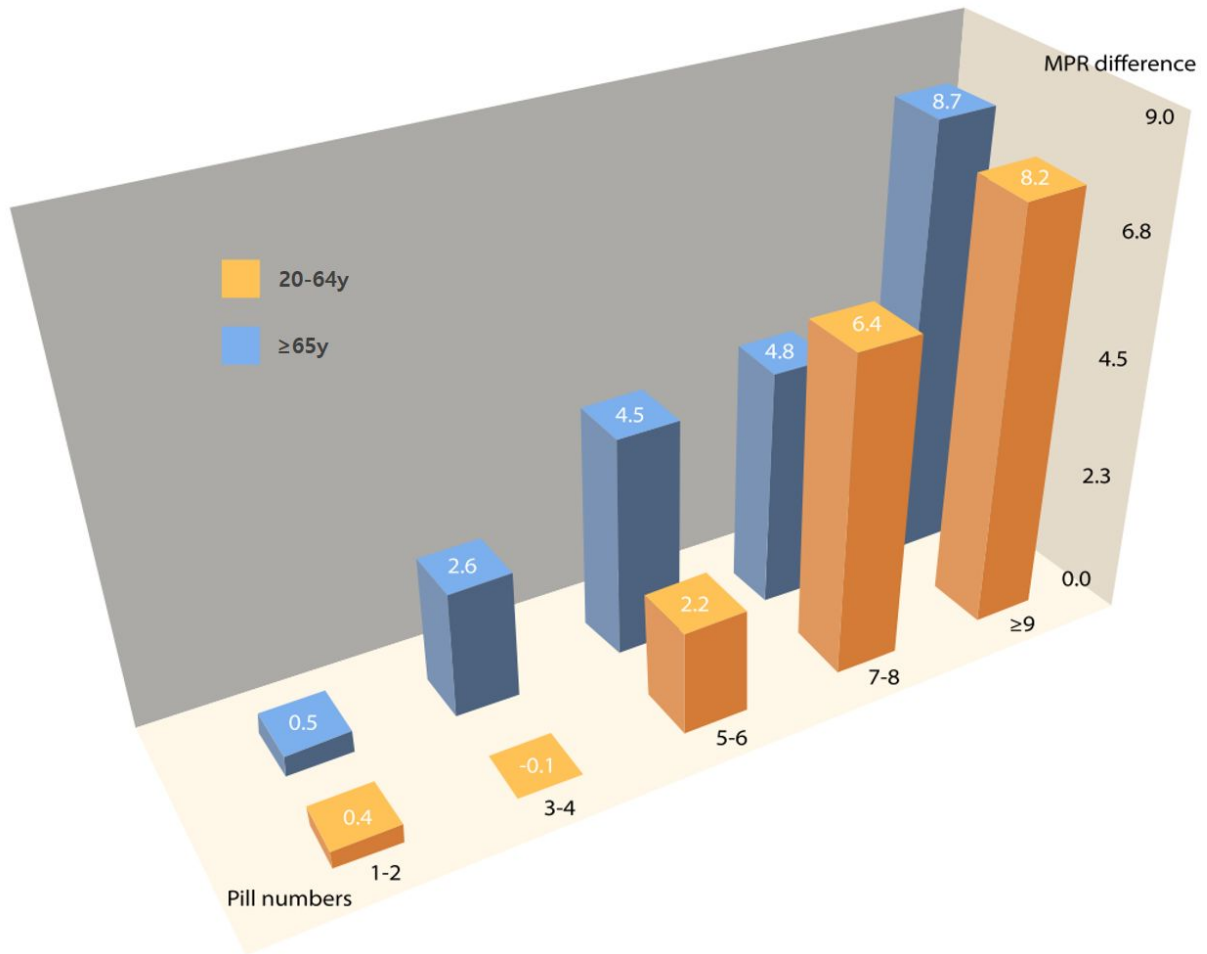

**Figure 3** Difference of medication adherences between MPC and SPC therapies according to combinations of pill numbers and age

The number of drugs for which the adherence difference begins to increase is 3-4 in the elderly group ( $\geq 65$  year) and 5-6 in the non-elderly group (20-64 year) ( $p < 0.05$ ).

MPC (multiple pill combination), SPC (single pill combination), MPR (medication possession ratio)

\*MPR difference = MPR of SPC group – MPR of MPC group

**Supplementary online contents. A single pill combination of antihypertensives does improve adherence: A Korean nationwide study**

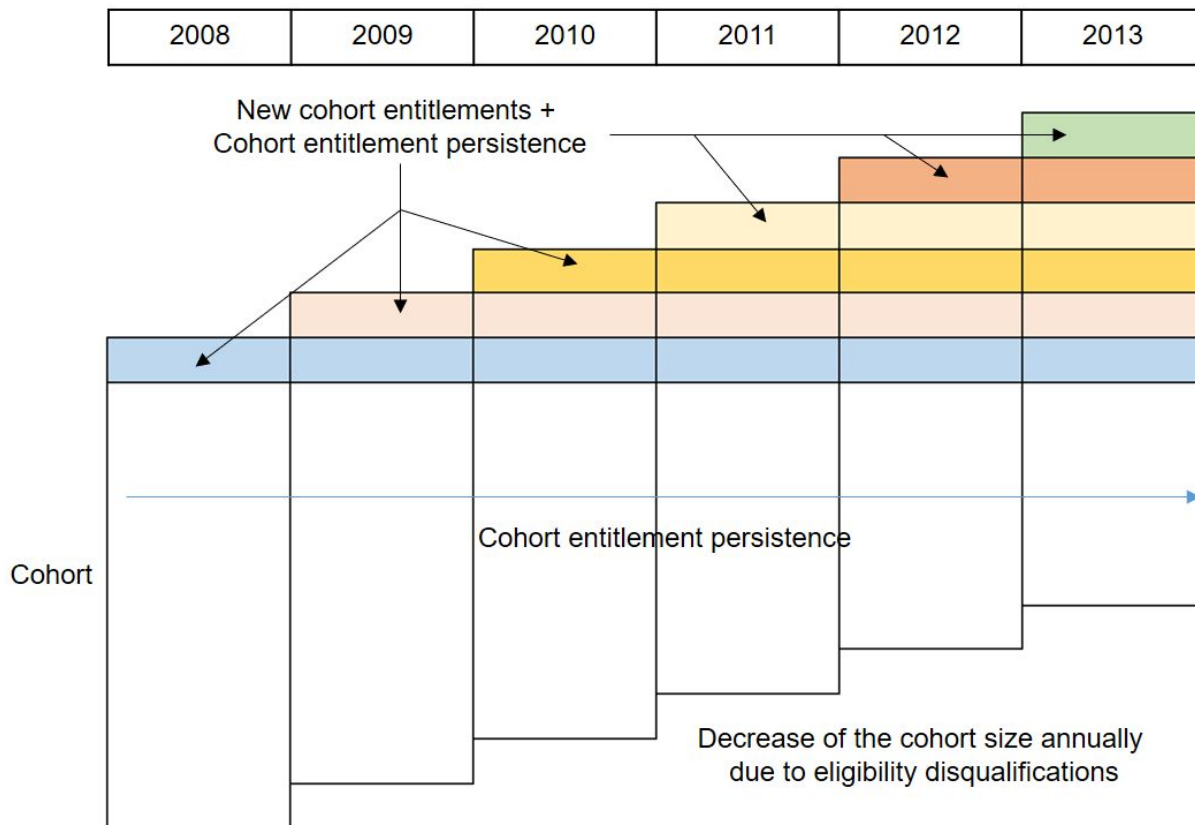

**Supplementary figure 1** Dynamic cohort design

Cohort size: About one million/year (2.2% of total population)

Cohort data include qualification data (birth, death, sex, family relationship, address, property, income, insurance type) and medical service use data (billing statement, medical records, diagnosis record, prescription record, etc.)

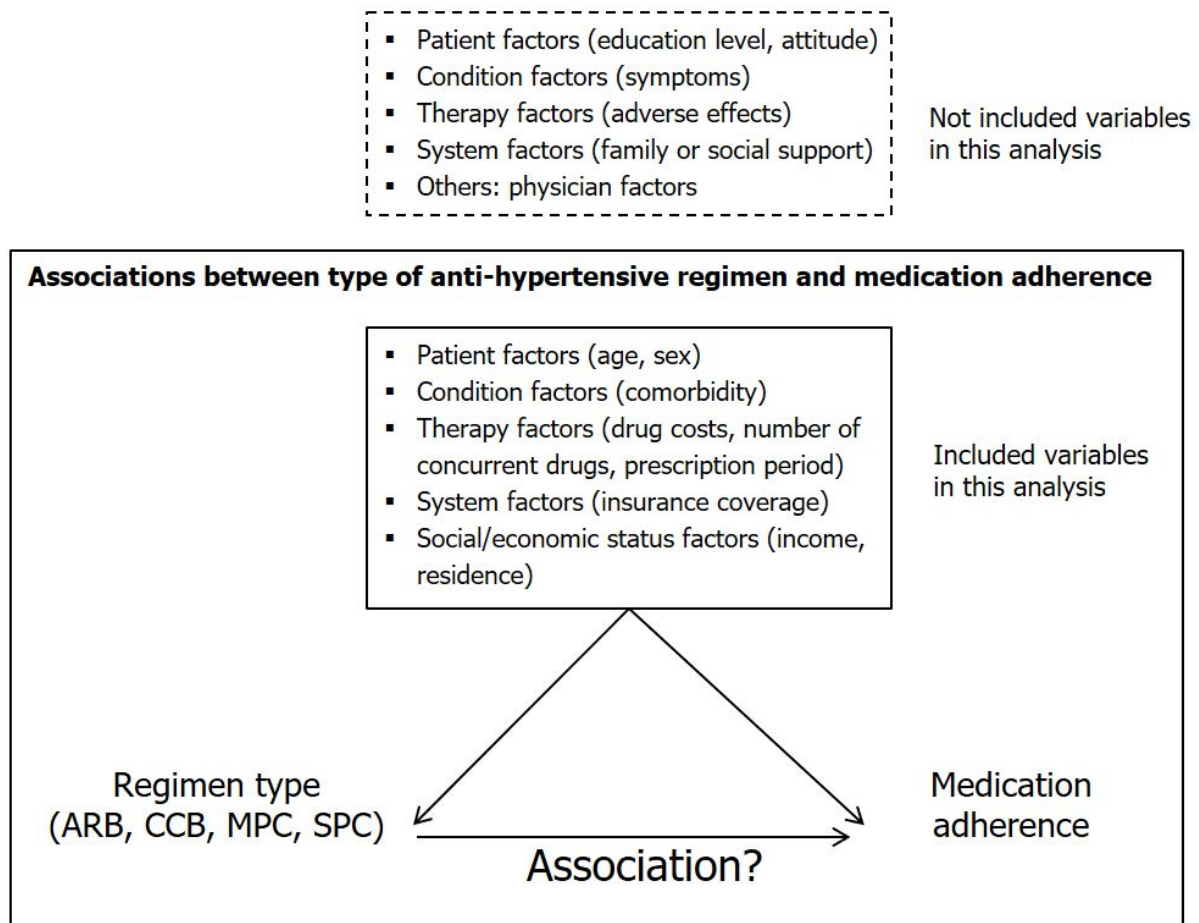

35 **Supplementary figure 2** Analysis scheme for factors related with anti-hypertensive medication  
36 adherence

37  
38  
39 ARB (angiotensin II receptor blockers), CCB (calcium channel blockers), MPC (multiple pill  
40 combination), SPC (single pill combination)  
41  
42  
43  
44  
45  
46  
47  
48  
49  
50  
51  
52  
53  
54  
55  
56  
57  
58  
59  
60

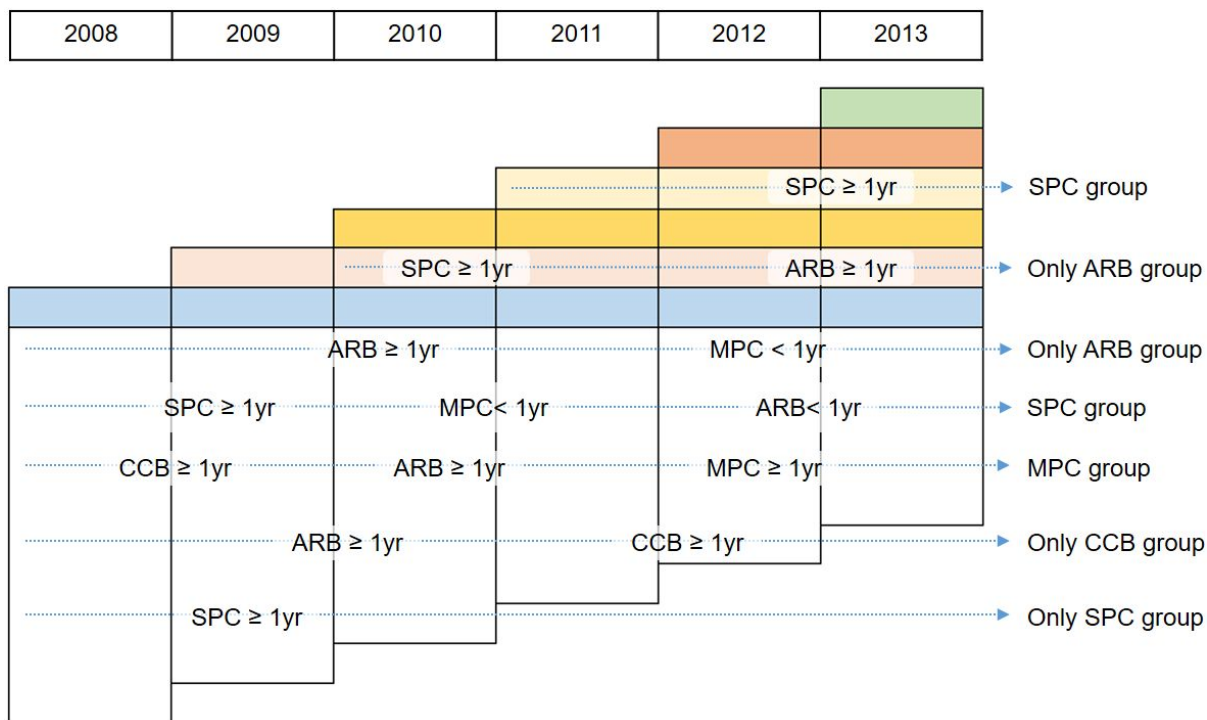

**Supplementary figure 3** Classification definition of anti-hypertension medication groups

ARB (angiotensin II receptor blockers), CCB (calcium channel blockers), SPC (single pill combination), MPC (multiple pill combination)

STROBE Statement—checklist of items that should be included in reports of observational studies

|                                |     |                                                                                                                                                                                                                                           |
|--------------------------------|-----|-------------------------------------------------------------------------------------------------------------------------------------------------------------------------------------------------------------------------------------------|
| <b>Title and abstract</b>      | 1.  | (a) Indicate the study's design with a commonly used term in the title or the abstract.<br>(b) Provide in the abstract an informative and balanced summary of what was found.<br><b>(mentioned in page 1-4 of the manuscript)</b>         |
| <b>Introduction</b>            |     |                                                                                                                                                                                                                                           |
| Background/rationale           | 2.  | Explain the scientific background and rationale for the investigation being reported.<br><b>(mentioned in page 5 of the manuscript)</b>                                                                                                   |
| Objectives                     | 3.  | State specific objectives, including any prespecified hypotheses.<br><b>(mentioned in page 5-6 of the manuscript)</b>                                                                                                                     |
| <b>Methods</b>                 |     |                                                                                                                                                                                                                                           |
| Study design                   | 4.  | Present key elements of study design early in the paper.<br><b>(mentioned in page 7-8 of the manuscript)</b>                                                                                                                              |
| Setting                        | 5.  | Describe the setting, locations, and relevant dates, including periods of recruitment, exposure, follow up, and data collection.<br><b>(mentioned in page 7-11 of the manuscript)</b>                                                     |
| Participants                   | 6.  | Give the eligibility criteria, and the sources and methods of selection of participants. Describe methods of follow-up<br><b>(mentioned in page 7-11 of the manuscript)</b>                                                               |
| <b>Variables</b>               | 7.  | Clearly define all outcomes, exposures, predictors, potential confounders, and effect modifiers. Give diagnostic criteria, if applicable.<br><b>(mentioned in page 8-10 of the manuscript)</b>                                            |
| <b>Data source/measurement</b> | 8.  | For each variable of interest, give sources of data and details of method of assessment (measurement). Describe comparability of assessment methods if there is more than one group.<br><b>(mentioned in page 7-11 of the manuscript)</b> |
| <b>Bias</b>                    | 9.  | Describe any efforts to address potential sources of bias.<br><b>(mentioned in page 7-11 of the manuscript)</b>                                                                                                                           |
| <b>Study size</b>              | 10. | Explain how the study size was arrived at.                                                                                                                                                                                                |

|                               |     |                                                                                                                                                                                                                                                                                                                                                                                                                                                                       |
|-------------------------------|-----|-----------------------------------------------------------------------------------------------------------------------------------------------------------------------------------------------------------------------------------------------------------------------------------------------------------------------------------------------------------------------------------------------------------------------------------------------------------------------|
|                               |     | <b>(mentioned in page 7-8 of the manuscript)</b>                                                                                                                                                                                                                                                                                                                                                                                                                      |
| <b>Quantitative variables</b> | 11. | Explain how quantitative variables were handled in the analyses. <b>(mentioned in page 7-9 of the manuscript)</b>                                                                                                                                                                                                                                                                                                                                                     |
| <b>Statistical methods</b>    | 12. | (a) Describe all statistical methods, including those used to control for confounding.<br>(b) Describe any methods used to examine subgroups and interactions.<br>(c) Explain how missing data were addressed.<br>(d) If applicable, explain how loss to follow-up was addressed.<br><b>(mentioned in page 9-11 of the manuscript)</b>                                                                                                                                |
| <b>Results</b>                |     |                                                                                                                                                                                                                                                                                                                                                                                                                                                                       |
| Participants                  | 13. | (a) Report numbers of individuals at each stage study- eg, numbers of potentially eligible, examined for eligibility, confirmed eligible, included in the study, completing follow up. And analysed.<br>(b) Give reasons for non-participation at each age.<br>(c) Consider use of a flow diagram.<br><b>(mentioned in page 12-13 of the manuscript)</b>                                                                                                              |
| Descriptive data              | 14. | (a) Give characteristics of study participants (eg, demographic, clinical social) and information on exposures and potential confounders.<br>(b) Indicate number of participants with missing data for each variable of interest.<br><b>(mentioned in page 12 of the manuscript)</b>                                                                                                                                                                                  |
| Outcome data                  | 15. | Report numbers of outcome events or summary measures over time.<br><b>(mentioned in page 12-13 of the manuscript)</b>                                                                                                                                                                                                                                                                                                                                                 |
| Main results                  | 16. | (a) Give unadjusted estimates and, if applicable, confounder-adjusted estimated and their precision (eg, 95% confidence interval). Make clear which confounders were adjusted for and why they were included.<br>(b) Report category boundaries when continuous variables were categorized.<br>(c) If relevant, consider translating estimates of relative risk into absolute risk for a meaningful time period<br><b>(mentioned in page 12-13 of the manuscript)</b> |
| Other analyses                | 17. | Report other analyses done- eg, analyses of subgroup and interactions, and sensitivity analyses.                                                                                                                                                                                                                                                                                                                                                                      |

|                          |     |                                                                                                                                                                                                                                   |
|--------------------------|-----|-----------------------------------------------------------------------------------------------------------------------------------------------------------------------------------------------------------------------------------|
|                          |     | <b>(mentioned in page 13 of the manuscript)</b>                                                                                                                                                                                   |
| <b>Discussion</b>        |     |                                                                                                                                                                                                                                   |
| Key results              | 18. | Summarise key results with reference to study objectives<br><b>(mentioned in page 14-19 of the manuscript)</b>                                                                                                                    |
| Limitations              | 19. | Discuss limitations of the study, taking into account sources of potential bias or imprecision. Discuss both direction and magnitude of any potential bias<br><b>(mentioned in page 19 of the manuscript)</b>                     |
| Interpretation           | 20. | Give a cautious overall interpretation of results considering objectives, limitations, multiplicity of analyses, results from similar studies, and other relevant evidence.<br><b>(mentioned in page 14-19 of the manuscript)</b> |
| Generalisability         | 21. | Discuss the generalisability (external validity) of the study results.<br><b>(mentioned in page 14-19 of the manuscript)</b>                                                                                                      |
| <b>Other information</b> |     |                                                                                                                                                                                                                                   |
| Funding                  | 22. | Give the source of funding and the role of the funders for the present study and, if applicable, for the original study on which the present article is based.<br><b>(mentioned in page 20 of the manuscript)</b>                 |

# BMJ Open

## Effects of combination drugs on antihypertensive medication adherence in a real-world setting: A Korean Nationwide Study

|                                 |                                                                                                                                                                                                                                                                                                                                                                                                                                                                                                                                                                                   |
|---------------------------------|-----------------------------------------------------------------------------------------------------------------------------------------------------------------------------------------------------------------------------------------------------------------------------------------------------------------------------------------------------------------------------------------------------------------------------------------------------------------------------------------------------------------------------------------------------------------------------------|
| Journal:                        | <i>BMJ Open</i>                                                                                                                                                                                                                                                                                                                                                                                                                                                                                                                                                                   |
| Manuscript ID                   | bmjopen-2019-029862.R1                                                                                                                                                                                                                                                                                                                                                                                                                                                                                                                                                            |
| Article Type:                   | Research                                                                                                                                                                                                                                                                                                                                                                                                                                                                                                                                                                          |
| Date Submitted by the Author:   | 23-Apr-2019                                                                                                                                                                                                                                                                                                                                                                                                                                                                                                                                                                       |
| Complete List of Authors:       | Kim, Seung Jae; Seoul St. Mary's Hospital, College of Medicine, The Catholic University of Korea, Family Medicine<br>Kwon, Oh Deog; Navy Medical Office, ROK Submarine Force Command<br>Cho, BeLong; Seoul National University Hospital, Family Medicine<br>Oh, Seung-Won; Healthcare System Gangnam Center, Seoul National University Hospital, Family Medicine<br>Lee, Cheol Min; Healthcare System Gangnam Center, Seoul National University Hospital, Family Medicine<br>Choi, Ho-Chun; Healthcare System Gangnam Center, Seoul National University Hospital, Family Medicine |
| <b>Primary Subject Heading</b>: | Cardiovascular medicine                                                                                                                                                                                                                                                                                                                                                                                                                                                                                                                                                           |
| Secondary Subject Heading:      | Pharmacology and therapeutics                                                                                                                                                                                                                                                                                                                                                                                                                                                                                                                                                     |
| Keywords:                       | Hypertension < CARDIOLOGY, medication adherence, angiotensin II receptor blocker, calcium channel blocker, single pill combination                                                                                                                                                                                                                                                                                                                                                                                                                                                |
|                                 |                                                                                                                                                                                                                                                                                                                                                                                                                                                                                                                                                                                   |

SCHOLARONE™  
Manuscripts



1  
2  
3  
4 **[Title Page]**  
5  
6

7 **Effects of combination drugs on antihypertensive medication adherence in a**  
8  
9 **real-world setting: A Korean Nationwide Study**  
10

11 Seung Jae Kim<sup>1</sup>, Oh Deog Kwon<sup>2</sup>, BeLong Cho<sup>3</sup>, Seung-Won Oh<sup>4</sup>,

12  
13  
14  
15 Cheol Min Lee<sup>4</sup> , Ho Chun Choi<sup>4\*</sup>  
16  
17

18  
19  
20 <sup>1</sup>Department of Family Medicine, Seoul St. Mary's Hospital, College of Medicine, The  
21 Catholic University of Korea, Seoul, Republic of Korea  
22

23  
24  
25 <sup>2</sup>Navy Medical Office, ROK Submarine Force Command, Changwon, Republic of  
26 Korea  
27

28  
29  
30 <sup>3</sup>Department of Family Medicine, Seoul National University Hospital, Seoul, Republic  
31 of Korea  
32

33  
34  
35 <sup>4</sup>Department of Family Medicine, Healthcare System Gangnam Center, Seoul National  
36 University Hospital, Seoul, Republic of Korea  
37

38  
39  
40  
41  
42  
43  
44 First author: Seung Jae Kim  
45

46  
47  
48  
49 Correspondence to:

50  
51  
52 Ho Chun Choi, MD, MPH  
53  
54  
55

1  
2  
3  
4 Department of Family Medicine, Healthcare System Gangnam Center, Seoul National  
5  
6 University Hospital , 39<sup>th</sup> Fl, Gangnam Finance Center, 152 Teheran-ro, Gangnam-  
7  
8 gu, Seoul, South Korea 06236  
9

10  
11  
12 Phone: +(82-2)-2112-5746  
13

14  
15 Fax: +(82-2)-2112-5794  
16

17  
18 E-mail: [skyho331@gmail.com](mailto:skyho331@gmail.com)  
19  
20  
21  
22  
23  
24  
25  
26  
27  
28  
29  
30  
31  
32  
33  
34  
35  
36  
37  
38  
39  
40  
41  
42  
43  
44  
45  
46  
47  
48  
49  
50  
51  
52  
53  
54  
55  
56  
57  
58  
59  
60

## Abstract

**Objectives:** We tried to clarify, by using representative national data in a real-world setting, whether single pill combinations (SPCs) of antihypertensives actually improves medication adherence.

**Design:** A nationwide population-based study

**Setting:** We used a 2.2% cohort (N=1,048,061) of total population (N=46,605,433) that was randomly extracted by National Health Insurance of Korea from 2008 to 2013.

**Participants:** We included patients (N=116,677) who were prescribed with the same antihypertensive drugs for at least one year and divided them into groups of ARB (Angiotensin-II-receptor-blocker)-only, CCB (Calcium-channel-blocker)-only, multiple pill combinations (MPCs), and SPCs of ARB/CCB.

**Primary outcome measures:** Medication possession ratio (MPR), a frequently used indirect measurement method of medication adherence.

**Results:** Adjusted MPR was higher in combination therapy (89.7% in SPC, 87.2% in MPC) than monotherapy (81.6% in ARB, 79.7% in CCB), and MPR of SPC (89.7%, confidence interval, [CI] 89.3-90.0) was higher than MPR of MPC (87.2%, CI 86.7-87.7) ( $p<0.05$ ). In subgroup analysis, adherences of SPC and MPC were 92.3% (CI 91.5-93.0) versus 88.1% (CI 87.1-89.0) in aged 65-74 years and 89.3% (CI 88.0-90.7) versus 84.8% (CI 83.3-92.0) in 75 years or older ( $p<0.05$ ). According to total pill numbers, adherences of SPC and MPC were 90.9% (CI 89.8-92.0) versus 85.3% (CI 84.1-86.5) in 7-8 pills and 91.2% (CI 89.3-93.1) versus 82.5% (CI 80.6-84.4) in 9 or more ( $p<0.05$ ). The adherence difference between SPC and MPC started to increase

1  
2  
3  
4 at 5-6 pills and at 50-64 years ( $p<0.05$ ). When analyzed according to elderly status,  
5  
6 the adherence difference started to increase at 3-4 pills in the elderly (65 years and  
7  
8 older) and at 5–6 in the non-elderly group (20-64 years) ( $p<0.05$ ). These difference  
9  
10 all widened further with increasing age and the total medications.  
11  
12

13 **Conclusion:** SPC regimens demonstrated higher adherence than MPC, and this  
14  
15 tendency is more pronounced with increasing age and total number of medications.  
16  
17

18 **Keywords** hypertension, medication adherence, angiotensin II receptor blocker,  
19  
20 calcium channel blocker, single pill combination  
21  
22  
23  
24  
25

#### 26 **Strengths and limitations of this study**

- 27  
28 ➤ The strength of this study is that we not only compared the adherence between combination  
29 and monotherapy of antihypertensive medications but also the adherence of single pill  
30 combination (SPC) and multiple pill combination (MPC) regimens in a real-world setting by  
31 using National Health Insurance Service National Sample Cohort (NHIS-NSC), a  
32 representative large scale health insurance claims data of Korea accounting for 2.2% of the  
33 total population.  
34
- 35 ➤ Another strength of this study is that we analyzed the differences in medication adherence  
36 of subjects who continued to take antihypertensive drugs for at least one year for the  
37 maximum of six observed years.  
38
- 39 ➤ NHIS-NSC data does not provide detailed information regarding some specific factors that  
40 could affect the medication adherence, such as the patient's education level, occupation,  
41 caregiver status, the family environment, and healthcare provider factors.  
42
- 43 ➤ We did not specify comorbidities according to severity, and only adjusted with the average  
44 number of diagnoses of the subject during the observation period.  
45  
46  
47  
48  
49  
50  
51  
52  
53  
54  
55  
56

## Introduction

Adherence to medication is an explanation of drug taking behavior, and refers to taking drugs in compliance with the time, dose, and frequency prescribed by the healthcare provider (1). The World Health Organization (WHO) defines medication non-adherence as a medically ill state, because low medication adherence causes the illness to progress and lowers the overall health outcome (1). Non-adherence may lead to various clinical risks. In many studies, low adherence is associated with higher mortality and hospitalization rates than higher adherence (2-4). Also, in terms of health economics, non-adherent patients use healthcare resources more than do adherent patients, and consequently the burden of social illness increases because of the increase in additional medical expenses (5-7). Non-adherence is observed more frequently for chronic than acute diseases, especially for hypertension, for which non-adherence is reported in 50–70% of the cases (1, 7-9).

Adherence to medication is determined by various aspects such as factors associated with the patient, condition, therapy, the healthcare system, and the social/economic status etc. (1, 5, 7, 10) Thus, to improve adherence a strategic approach to the specific cause is needed. Regarding these factors, there were some previous studies showing a relation between a lower number of medications taken by a patient and higher adherence in chronic diseases such as hypertension (11-15). This implies that selecting a single pill combination (SPC) prescription could increase adherence compared to a multiple pill combination (MPC) prescription (11-15). However, most of the previous research reported results obtained under certain

1  
2  
3  
4 center conditions or were short-term studies of small samples, and systematic field  
5 surveys using real-world representative data were not common. Therefore, the aim  
6  
7 of this study is to investigate the effect of SPC on the adherence to antihypertensive  
8  
9 medication in a real-world setting. In order to do this, we first checked the overall  
10  
11 medication prescription status of hypertensive patients and investigated the relation  
12  
13 between multiple medication prescriptions, age, and medication adherence to  
14  
15 antihypertensive agents.  
16  
17  
18  
19  
20  
21  
22  
23  
24  
25  
26  
27  
28  
29  
30  
31  
32  
33  
34  
35  
36  
37  
38  
39  
40  
41  
42  
43  
44  
45  
46  
47  
48  
49  
50  
51  
52  
53  
54  
55  
56  
57  
58  
59  
60

## Methods

### Data source

The data used in this study was obtained from the National Health Insurance Service National Sample Cohort (NHIS-NSC) of Korea. This data is a sample of 1,048,061 individuals, around 2.2% of the total population (N=46,605,433), and provides national health information according to sex, age, and income. In addition, this cohort data is obtained through continuous observation every year, and includes qualification data (birth, death, sex, family relationship, address, property, income, insurance type), medical service use data (billing statement, medical record, diagnosis record, prescription record, etc.), and health examination data (Supplementary Figure 1) (16).

### Study population

In total, 206,739 hypertensive patients taking antihypertensive medications were selected from the 2008 to 2013 NHIS-NSC (N=1,048,061, total outpatient prescriptions: 221,750,977 cases). Hypertensive patients were defined as all patients with the International Classification of Diseases Tenth Revision (ICD-10) codes that featured hypertension (I10, I11, I12, I13, I15). Our selection of antihypertensive agents was limited to dihydropyridine calcium channel blockers (CCBs) and angiotensin II receptor blockers (ARBs), the most commonly prescribed antihypertensive agents (17, 18). This was to exclude the effects of adherence due to the class effect of antihypertensive medications. Therefore, all ARBs, CCBs and ARB/CCB compound

1  
2  
3  
4 drugs, as classified according to the Anatomical Therapeutic Chemical (ATC)  
5 classification system of drugs (19), that were sold domestically from January 1, 2008  
6 to December 31, 2013 were included as antihypertensive medication.. A total of 108  
7 types of drugs were identified under the ATC system. Since the Korean release date  
8 of Exforge® (amlodipine/valsartan combination), the first ARB/CCB compound drug,  
9 was September 1, 2007, the analysis period was set as starting from 2008. Of the  
10 167,793 patients taking targeted antihypertensive agents (ARBs, CCBs, and  
11 ARB/CCB compounds), only those aged 20 years or older were selected (N=167,234).  
12 To prevent statistical deviation caused by extreme values, the upper 0.01% values for  
13 number of drugs and diagnoses, along with missing values were excluded. Most ARB,  
14 CCB, and SPC of ARB/CCB are prescribed as a once-a-day dosing. When a high-  
15 dose prescription is needed in Korea, most clinicians prescribe one high dose tablet  
16 rather than two regular dose tablets, because of insurance coverage standards.  
17 Therefore, most antihypertensive agents are prescribed so that patients are directed  
18 to take 0.5 or 1 tablet once a day. Thus, we excluded prescriptions that were not in  
19 the '0.5 or 1 tablet once a day' form (N=162,564). In addition, only those who received  
20 antihypertensive medication for at least one year were selected to ensure a more  
21 objective and stable measurement of medication adherence. As a result, 116,677  
22 patients were ultimately selected for the study (Figure 1). This study was approved by  
23 the institutional review board (IRB) at the Seoul National University Hospital (IRB  
24 No.E-15-5-079-673) and National Health Insurance review committee for research  
25 support (NHIS-2017-2-610). Written informed consent was waived.  
26  
27  
28  
29  
30  
31  
32  
33  
34  
35  
36  
37  
38  
39  
40  
41  
42  
43  
44  
45  
46  
47  
48  
49  
50  
51  
52  
53  
54  
55  
56  
57  
58  
59  
60



## Assessment of adherence

Medication adherence was calculated using the Medication Possession Ratio (MPR), a frequently used indirect measurement method (5, 7, 20). MPR is calculated by dividing the total days supplied (excluding supplied days for the last clinic visit) by the number of days between the first and last refills (7).

$$\text{MPR} = \frac{\text{total days supplied (TDS)}}{\text{number of days between the first and last refills (prescription period, [PP])}}$$

The limitation of MPR is that adherence can be overestimated, because the total days supplied is assumed to be the days the drug is actually used (20, 21).

Nevertheless, MPR was used in this study because it is considered the best method to evaluate the adherence of antihypertensive agents using retrospective data (21).

Theoretically, MPR may exceed 100% if the patient visits prematurely before the drug is fully consumed. Thus, for the purposes of this study, MPR measuring over 100% was capped at 100%.

## Factors related to adherence

Medication adherence is determined by the interactions of factors associated with the patient, condition, therapy, healthcare system, and social/economic status etc. (1, 5, 7, 10). In this study, factors associated with the patient (age, sex), condition (comorbidity), therapy (drug costs, number of concurrent drugs, prescription period),

1  
2  
3  
4 healthcare system (insurance coverage), and social/economic status (income,  
5  
6 residence) were derived as confounding variables and used in the statistical  
7  
8 analysis. Education, occupation, related symptoms, adverse effects of the treatment,  
9  
10 family and caregiver status, and medical staff factors, which are known to affect  
11  
12 adherence, were not included in the study, because they were not identifiable in the  
13  
14 NHIS-NSC data (Supplementary Figure 2). In this study, comorbidities were  
15  
16 calculated as the mean number of the subjects' diagnoses during the observation  
17  
18 period. The number of drugs taken was calculated as the average number of  
19  
20 medication taken by subjects during the observation period.  
21  
22  
23  
24  
25  
26  
27

### 28 **Statistical analysis**

29  
30  
31 The study subjects were divided into four groups according to the type of  
32  
33 antihypertensive drugs they were taking: the ARB-only group, CCB-only group, MPC  
34  
35 group, and SPC group. The average adherence of the four groups was examined.  
36  
37 Each group was assigned according to the last drug taken by the subjects to  
38  
39 categorize them without overlapping (Supplementary Figure 3). The reason for  
40  
41 dividing the group according to the last drug taken is that selecting the last period of  
42  
43 hypertension treatment enables to attain relatively stabilized medication adherence  
44  
45 than choosing an early period of hypertension treatment. Another reason is that if the  
46  
47 group is divided according to the initial drug taken, the SPC group may not be  
48  
49 selected at all. We compared the average adherence of the four groups before and  
50  
51 after adjusting confounding factors using analysis of covariance (ANCOVA). A  
52  
53  
54  
55  
56  
57  
58  
59  
60

1  
2  
3  
4 subgroup analysis, which compared the differences in adherence of each group  
5  
6 according to age group (20–49 years, 50–64 years, 65–74 years, and 75 years–)  
7  
8 and number of medications, was conducted. We also compared the adherence  
9  
10 difference between MPC and SPC therapies according to the combination of an old-  
11  
12 age standard (65 years) and number of medications. Finally, a sensitivity analysis of  
13  
14 age and the number of medications affecting differences in adherence was  
15  
16 conducted. All analyses were conducted by using STATA version 14.0(Stata Corp.,  
17  
18 College Station, TX, USA) and P-values less than 0.05 were regarded as statistically  
19  
20 significant.  
21  
22  
23  
24  
25  
26  
27  
28  
29

### 30 **Patient and public involvement**

31 There was no patient or public involvement in the development of this study.  
32  
33  
34  
35  
36  
37  
38  
39  
40  
41  
42  
43  
44  
45  
46  
47  
48  
49  
50  
51  
52  
53  
54  
55  
56  
57  
58  
59  
60

## Results

### Baseline characteristics

Of the 116,677 subjects, 29,400 were in the ARB-only group, 58,401 in the CCB-only group, 10,458 in the MPC group, and 18,418 in the SPC group. Among all subjects, 47.3% were male and 52.7% female. Most subjects were aged in their 60s, followed by those in their 50s, 70s, and 40s. Subjects had an average of three to four diagnoses, and were taking an average number of four medications (three to four drugs were the most common, followed by four to five) (Table 1).

### Adherence comparison

The crude mean (mean  $\pm$  standard deviation, [SD]) of MPR for each group was 81.0  $\pm$  23.9% in the ARB-only group, 80.9  $\pm$  23.2% in the CCB-only group, 85.3  $\pm$  19.6% in the MPC group, and 87.7  $\pm$  17.7% in the SPC group. The adjusted MPR was 81.6% (95% confidence interval, [CI] 81.3-81.9) in the ARB-only group, 79.7% (95% CI 79.5-79.9) in the CCB-only group, 87.2% (95% CI 86.7-87.7) in the MPC group, and 89.7% (95% CI 89.3-90.0%) in the SPC group. Regardless of the adjustment, medication adherence was higher in the combination therapy than monotherapy groups, and adherence of the SPC group was higher than that of the MPC group when comparing combination therapies ( $p < 0.05$ ) (Table 2). The adherence difference between the SPC and MPC groups was more significant as age and the number of drugs taken increased. The adherence difference between the two groups started to increase when the number of medications was at 5-6, and further widened when the number of drugs increased ( $p < 0.05$ ) (Table 2). The adherence difference

1 between the MPC and monotherapy groups began to decrease when the number of  
2 medications was at 7-8 and there was simply no difference between them when the  
3 number of total drugs taken were nine or more. However the difference between the  
4 SPC and monotherapy groups remained high (Table 2, Figure 2).  
5  
6  
7  
8  
9  
10  
11  
12

### 13 **Subgroup analysis**

14  
15 The number of medications and adherence was analyzed by dividing subjects into  
16 elderly and non-elderly groups (cut-off age: 65 years). Regardless of the elderly  
17 status, the adherence difference between the SPC and MPC groups increased when  
18 the number of drugs increased. The adherence difference started to increase  
19 significantly when the number of drugs taken was at 3–4 in the elderly group (aged  
20 65 years and over) and 5–6 in the non-elderly group (aged 20–64 years) ( $p < 0.05$ )  
21 (Figure 3). When a sensitivity analysis was conducted based on the number of drugs  
22 per detailed age group (20–49 years, 50–64 years, 65–74 years, and 75 years or  
23 older), the same tendency emerged for overall medication adherence. The age 20–  
24 49 group and age 75 or older group, which consisted of a relatively small number of  
25 samples, demonstrated a similar tendency, but the tendency was only marginally  
26 significant (Table 3).  
27  
28  
29  
30  
31  
32  
33  
34  
35  
36  
37  
38  
39  
40  
41  
42  
43  
44  
45  
46  
47  
48  
49  
50  
51  
52  
53  
54  
55  
56  
57  
58  
59  
60

## Discussion

1  
2  
3 First, among the 1,048,061 patients enrolled in the NHIS-NSC from 2008 to 2013,  
4 206,739 were diagnosed with hypertension, a prevalence of 19.7%. This differs  
5 somewhat from the 23.7% prevalence of hypertension in Korea, as reported by the  
6 Korean Centers for Disease Control and Prevention in 2013 (22). The reason for this  
7 difference seems to be that some people do not get medical treatment even when  
8 diagnosed with hypertension. In fact, according to the Korean National Health and  
9 Nutrition Examination Survey (KNHANES) in 2013, the hypertension unawareness  
10 rate in Korea is 38.5%, and the untreated rate is 34.7% (22). Considering these  
11 values, the prevalence of hypertension in the sample of this study is similar to the  
12 prevalence in Korea. Thus, the data used in this study can be considered a  
13 representative sample reflecting the characteristics of the whole population without  
14 bias. Comparing these rates with other countries, the unawareness and untreated  
15 rates of hypertension in the United States during 2007-2010 were 18.9% and 26%,  
16 respectively (23). In England in 2006, the unawareness rate was 34.7% and  
17 untreated rate 48.7% (24). In Canada, the unawareness rate was 16.7% and  
18 untreated rate 20.1 % in the period 2007–2009 (24). These statistics indicate that the  
19 prevalence of hypertension identified in hospitals is slightly lower than the overall  
20 prevalence, suggesting the same tendency as found in this study.

21  
22  
23  
24  
25  
26  
27  
28  
29  
30  
31  
32  
33  
34  
35  
36  
37  
38  
39  
40  
41  
42  
43  
44  
45 In this study, the comparison of medication adherence of the four groups showed  
46 that adherence in combination therapy was higher than that in monotherapy. These  
47 results can be explained by applying the Health Belief Model (25, 26). Those who  
48 think that the severity of their hypertension is higher (e.g., by being prescribed  
49 combination therapy), are more likely to try to maintain adequate blood pressure by  
50  
51  
52  
53  
54  
55  
56

1 taking antihypertensive agents as prescribed (27, 28). Schulz et al. found that when  
2 prescribing antihypertensive agents such as angiotensin converting enzyme  
3 inhibitors, ARBs, Beta blockers, and CCBs with diuretics as SPC therapy, patients'  
4 non-persistent risk was 8.4% lower and the possibility of non-adherence 19.4% lower  
5 than when prescribing these drugs as monotherapy without diuretics (29). Patel et al.  
6 also reported that patients with SPC therapy including Hydrochlorothiazide (HCTZ)  
7 demonstrated higher adherence than those using HCTZ monotherapy (30). Patel's  
8 study did not include subjects' baseline blood pressure information, but assumed  
9 that the monotherapy group was in the early stage of hypertension (30). In addition,  
10 Van Wijik et al. reported that the group that had initiated hypertension treatment with  
11 combination therapy had higher drug persistence than the group that started with  
12 monotherapy. Furthermore, they assumed that the reason for the higher persistence  
13 for the combination therapy group was related to the severity of the disease (31).  
14 Another study by Hashmi et al. reported that the average adherence of hypertensive  
15 patients was 79% when treated with monotherapy, 87% when treated with two  
16 drugs, and 90% when treated with three or more drugs (32). They also suggested  
17 that these results might be related to patients' increased awareness, because of their  
18 hypertension severity. As such, patients treated with combination therapy may be  
19 more adherent, because they are more likely to take medication with greater  
20 awareness than people treated with a single agent since their hypertension is more  
21 severe.

22  
23  
24  
25  
26  
27  
28  
29  
30  
31  
32  
33  
34  
35  
36  
37  
38  
39  
40  
41  
42  
43  
44  
45  
46  
47  
48  
49 In this study, the medication adherence of the SPC group was found to be higher  
50 than that of the MPC group, consistent with the findings of previous research (11-  
51 15). A meta-analysis by Gupta et al., which compared antihypertensive medication  
52  
53  
54  
55  
56

1 adherence between SPC and MPC prescriptions, confirmed the significantly higher  
2 adherence of the SPC group than the MPC group in all three cohort studies and two  
3 trials. [Odds ratio: 1.21(95% CI: 1.03 to 1.43)] (12). Sherrill et al. also performed a  
4 meta-analysis of seven studies that compared adherence between two groups using  
5 MPR. All seven studies reported significantly higher adherence in the SPC than MPC  
6 group, regardless of experience of antihypertensive agents (13).  
7  
8  
9  
10  
11  
12  
13

14 Furthermore, previous studies comparing medication adherence to SPC and MPC  
15 of ARB/CCB regimens, such as this study, indicated the same results (14, 15). In a  
16 study using pharmacy claims data by Zeng et al., the proportion of good adherence  
17 in the ARB/CCB SPC group was 45.9%, higher than the 35.3% of the MPC group  
18 (14). However, their study had fewer subjects and shorter observation periods, and  
19 only included two types of ARB/CCB compound pills for the SPC group (14). A real-  
20 world study by Basner et al. reported that the adherence of the ARB/CCB SPC group  
21 was higher than the MPC group [Odds ratio: 1.38, 95% CI: (1.24, 1.53)] (15).  
22 However, although Basner's study was set in the real-world like this study, the  
23 sample size was small, including only 3,259 subjects and short-term observation for  
24 two years. Regarding drug type, they included various types of ARB/CCB for the  
25 MPC group, but limited the SPC group's drug type to the valsartan/amlodipine  
26 compound (15). Compared to the two studies mentioned above, the current study  
27 may have confirmed the differences in adherence between SPC and MPC  
28 prescriptions by analyzing long-term adherence for all ARBs, CCBs, and ARB/CCB  
29 compounds available during the period of observation using a more systematic and  
30 representative large-scale data.  
31  
32  
33  
34  
35  
36  
37  
38  
39  
40  
41  
42  
43  
44  
45  
46  
47  
48  
49  
50  
51  
52  
53

54 In addition, this study revealed that the higher the age, the greater the difference in  
55  
56



1 adherence between the SPC and MPC groups (Table 2, Figure 2). According to  
2 Salas et al., cognitive impairment is a factor in decreasing adherence to  
3 antihypertensive medication in isolated patients (33). Moreover, according to  
4 Schwartz et al., the rate of drug use errors in patients aged more than 75 years was  
5 higher than those of patients younger than 75 years (34). Presumably, it would be  
6 more difficult for the elderly to take both drugs accurately without omission when  
7 taking MPC medications, since the frequency of decline in both physical and  
8 cognitive functions is higher in older age (33, 35). In this regard, as the patient's age  
9 increases, prescribing SPCs that simplifies the complexity of the medication regimen  
10 may be more beneficial in increasing adherence, because for MPC prescriptions  
11 compliance is reduced even when only one of the prescribed drugs is omitted.  
12  
13  
14  
15  
16  
17  
18  
19  
20  
21  
22  
23  
24  
25

26 We also confirmed that the greater the number of drugs taken, the greater the  
27 difference in adherence between the SPC and MPC groups (Table 2, Figure 2). The  
28 reason for this tendency is that patients on MPC therapy need to take two drugs  
29 separately; the additional medication increases the complexity to a greater extent  
30 than when SPC medication is taken. Toh et al. reported that a complex medication  
31 regimen such as multiple doses per day and multiple medications was significantly  
32 associated with higher non-compliance and readmissions (36). In addition, Pasina et  
33 al. reported that for the elderly aged more than 65 years hospitalized in internal  
34 medicine wards, the greater the number of prescription drugs at discharge, the lower  
35 the medication adherence and understanding of the purpose of medication (37).  
36  
37  
38  
39  
40  
41  
42  
43  
44  
45  
46  
47  
48  
49 Therefore, prescribing an SPC regimen would be one way to increase medication  
50 adherence, especially of patients taking a large number of medications.  
51  
52  
53

54 Finally, comparing the adherence difference between the SPC and MPC groups  
55  
56

1 according to both age and number of medications, there was a dose-response  
2 relationship tendency in which the more the number of drugs, the more prominent  
3 the difference regardless of age. However, this tendency started to be significant  
4 when number of drugs taking was three or more in the elderly group (aged 65 years  
5 and over) and five or more in the non-elderly group (aged 20–64 years) (Figure 3).  
6  
7 Thus, the number of drugs affecting medication complexity showed a slight  
8 difference between the elderly and non-elderly group. The significant point of the  
9 number of medications, namely the significant point when the adherence difference  
10 between SPC and MPC becomes statistically significant, was slightly different  
11 between the detailed age groups, but the tendency remained the same (Table 3).  
12  
13 The reason for this difference is that it is more difficult for older patients to adapt to  
14 regimen complexity, because of impaired physical and cognitive functions mentioned  
15 above (33, 35).  
16  
17

18  
19 Our study is meaningful for two reasons. First, we analyzed the adherence of  
20 antihypertensive agents by using a sample of national cohort data that represents  
21 about 2.2% of the total population. Second, we analyzed the differences in  
22 medication adherence using cohort subjects who continued to take antihypertensive  
23 medication for at least one year for the maximum of six observed years. Although  
24 previous research analyzed medication adherence between the SPC and MPC of  
25 antihypertensive agents, (11-15) they were either short-term studies or analyzed in  
26 certain centers or under limited conditions. In addition, this study is meaningful,  
27 because it compared not only adherence to a combination therapy regimen type, but  
28 also compared it to monotherapy. Furthermore, we investigated all of the  
29 prescriptions and the average number of associated diseases involved with the  
30  
31  
32  
33  
34  
35  
36  
37  
38  
39  
40  
41  
42  
43  
44  
45  
46  
47  
48  
49  
50  
51  
52  
53  
54  
55  
56  
57  
58  
59  
60

1 patients, which enabled us to more objectively adjust the factors associated with the  
2 therapy and the patients' condition.  
3  
4

5 On the other hand, because of limitations in data, this study did not reflect diverse  
6 socioeconomic factors such as the patients' education level and occupation, and did  
7 not include specific factors such as caregiver status, the family environment, and  
8 healthcare provider factors. We also did not include antihypertensive agents other  
9 than ARBs and CCBs (e.g., diuretics, beta blockers, etc.) in the analysis. However,  
10 since the same class of drugs is homogenous, we were able to focus on comparing  
11 the adherence between SPC and MPC by eliminating the effects on adherence of  
12 drug classes other than ARBs and CCBs.  
13  
14  
15  
16  
17  
18  
19  
20  
21  
22

23  
24 Moreover, there is a weakness in the analysis regarding adjusting for patients'  
25 comorbidities. This study did not specify comorbidities according to severity, and  
26 only adjusted with the average number of diagnoses of the subject during the  
27 observation period. But in reality, some patients are diagnosed with many mild  
28 diseases, while others have few diagnoses but more severe diseases. Also, while  
29 new diseases can be additionally diagnosed at any point in the observation period, a  
30 new disease diagnosed at a certain point cannot be considered as having affected  
31 the medication adherence of the whole observation period. That is why we adjusted  
32 the comorbidities as the average number of diagnoses.  
33  
34  
35  
36  
37  
38  
39  
40  
41  
42  
43  
44  
45

46 Finally, due to the inevitable limitation of real-world claims data, we could not  
47 compare the first year adherence of each group even though the first year is usually  
48 an important phase for adherence in newly treated patients. When using real-world  
49 data such as the NHIS-NSC used here, it is practically impossible to divide subjects  
50 into certain drug groups without implementing some operationalization. This is due to  
51  
52  
53  
54  
55  
56

1 the fact that medications prescribed to patients can be changed, added or even  
2 discontinued during the course of the observation period. Moreover, we concluded  
3 that categorizing patients into four groups according to the last drug taken by  
4 subjects was the most ideal way since not many patients start with SPC as initial  
5 therapy unless their hypertension is severe. We also thought that comparing average  
6 adherence up to maximum of six years was suitable, since the subjects in our study  
7 were not limited to newly treated patients.  
8  
9  
10  
11  
12  
13  
14  
15  
16

17 In conclusion, those taking antihypertensive drugs as a combination therapy  
18 demonstrated higher adherence than those taking them as a monotherapy. Among  
19 the combination therapy patients, those on the SPC regimen demonstrated higher  
20 adherence than those taking the MPC prescription. This tendency was more  
21 pronounced with increasing age and the number of drugs taken. Therefore, if  
22 patients are older or taking numerous medications, prescribing antihypertensive  
23 agents as a SPC regimen may help improve medication adherence.  
24  
25  
26  
27  
28  
29  
30  
31  
32

33 **Contributors:** SJ Kim conceived and designed the study, acquired and analyzed the data, interpreted  
34 the study findings, and drafted the manuscript. OD Kwon analyzed the data, interpreted the study  
35 findings. SW oh, CM Lee, and BL Cho critically reviewed the manuscript. HC Choi conceived and  
36 designed the study, supervised and directed the conduct of the study, interpreted the study findings,  
37 and critically revised the manuscript. All authors had full access to all of the data and the accuracy of  
38 the data analysis. The corresponding author attests that all listed authors meet authorship criteria and  
39 that no other meeting the criteria have been omitted. HC Choi is the guarantor.  
40  
41  
42  
43  
44  
45  
46

47 **Funding:** This research received no specific grant from any funding agency in the public, commercial  
48 or not-for-profit sectors.  
49

50 **Competing Interests:** All authors have completed the ICMJE uniform disclosure form at  
51 [www.icmje.org/coi\\_disclosure.pdf](http://www.icmje.org/coi_disclosure.pdf) and declare: None of the authors reported disclosures.  
52  
53

54 **Patient consent for publication:** Not required.  
55  
56

1  
2  
3  
4  
5  
6  
7  
8  
9  
10  
11  
12  
13  
14  
15  
16  
17  
18  
19  
20  
21  
22  
23  
24  
25  
26  
27  
28  
29  
30  
31  
32  
33  
34  
35  
36  
37  
38  
39  
40  
41  
42  
43  
44  
45  
46  
47  
48  
49  
50  
51  
52  
53  
54  
55  
56  
57  
58  
59  
60

**Ethics approval:** This study was approved by the institutional review board (IRB) at the Seoul National University Hospital (IRB No.E-15-5-079-673) and National Health Insurance review committee for research support (NHIS-2017-2-610). Written informed consent was waived.

**Data sharing:** Data are from the National Health Insurance service (NHIS). Interested researchers can request access to the data from NHIS. The detailed information for data access of NHIS could be obtained from the NHIS website ([www.nhis.or.kr](http://www.nhis.or.kr)).

For peer review only

## References

1. Sabaté E. Adherence to long-term therapies: evidence for action: World Health Organization; 2003.
2. Simpson SH, Eurich DT, Majumdar SR, Padwal RS, Tsuyuki RT, Varney J, Johnson AJ. A meta-analysis of the association between adherence to drug therapy and mortality. *Bmj*. 2006;333(7557):15.
3. Shin S, Song H, Oh S-K, Choi KE, Kim H, Jang S. Effect of antihypertensive medication adherence on hospitalization for cardiovascular disease and mortality in hypertensive patients. *Hypertension Research*. 2013;36(11):1000.
4. Hong JS, Kang HC. Relationship between oral antihyperglycemic medication adherence and hospitalization, mortality, and healthcare costs in adult ambulatory care patients with type 2 diabetes in South Korea. *Medical care*. 2011;378-84.
5. Ho PM, Bryson CL, Rumsfeld JS. Medication adherence: its importance in cardiovascular outcomes. *Circulation*. 2009;119(23):3028-35.
6. Marcum ZA, Sevick MA, Handler SM. Medication nonadherence: a diagnosable and treatable medical condition. *Jama*. 2013;309(20):2105-6.
7. Iuga AO, McGuire MJ. Adherence and health care costs. *Risk management and healthcare policy*. 2014;7:35.
8. Osterberg L, Blaschke T. Adherence to medication. *New England Journal of Medicine*. 2005;353(5):487-97.
9. Park J-H, Shin Y, Lee S-Y, Lee SI. Antihypertensive drug medication adherence and its affecting factors in South Korea. *International journal of cardiology*. 2008;128(3):392-8.
10. Tajouri TH, Driver SL, Holmes Jr DR. 'Take as directed'—strategies to improve adherence to cardiac medication. *Nature Reviews Cardiology*. 2014;11(5):304.
11. Bangalore S, Kamalakkannan G, Parkar S, Messerli FH. Fixed-dose combinations improve medication compliance: a meta-analysis. *The American journal of medicine*. 2007;120(8):713-9.
12. Gupta AK, Arshad S, Poulter NR. Compliance, safety, and effectiveness of fixed-dose combinations of antihypertensive agents: a meta-analysis. *Hypertension*. 2010;55(2):399.
13. Sherrill B, Halpern M, Khan S, Zhang J, Panjabi S. Single-pill vs free-equivalent combination therapies for hypertension: a meta-analysis of health care costs and adherence. *The Journal of Clinical Hypertension*. 2011;13(12):898-909.
14. Zeng F, Patel B, Andrews L, Frech-Tamas F, Rudolph A. Adherence and persistence of single-pill ARB/CCB combination therapy compared to multiple-pill ARB/CCB regimens. *Current medical research and opinion*. 2010;26(12):2877-87.
15. Baser O, Andrews L, Wang L, Xie L. Comparison of real-world adherence, healthcare resource utilization and costs for newly initiated valsartan/amlodipine single-pill combination versus angiotensin receptor blocker/calcium channel blocker free-combination therapy. *Journal of medical economics*. 2011;14(5):576-83.
16. Lee J, Lee JS, Park S-H, Shin SA, Kim K. Cohort profile: the national health insurance service—national sample cohort (NHIS-NSC), South Korea. *International journal of epidemiology*. 2016;46(2):e15-e.
17. Xu H, He Y, Xu L, Yan X, Dai H. Trends and patterns of five antihypertensive drug classes between 2007 and 2012 in China using hospital prescription data. *International journal of clinical pharmacology and therapeutics*. 2015;53(6):430-7.
18. Ishida T, Oh A, Hiroi S, Shimasaki Y, Tsuchihashi T. Current use of antihypertensive drugs in Japanese patients with hypertension: Analysis by age group. *Geriatrics & gerontology international*. 2018.
19. Organization WH. The anatomical therapeutic chemical classification system with defined daily doses (ATC/DDD). Oslo: WHO. 2006.
20. Andrade SE, Kahler KH, Frech F, Chan KA. Methods for evaluation of medication adherence and persistence using automated databases. *Pharmacoepidemiology and drug safety*. 2006;15(8):565-74.
21. Halpern MT, Khan ZM, Schmier JK, Burnier M, Caro JJ, Cramer J, Daley WL, Gurwitz J, Hollenberg NK. Recommendations for evaluating compliance and persistence with hypertension therapy using retrospective data. American Heart Association, Inc.; 2006.
22. Statistics Korea, The 2013 report of the Korea National Health and Nutrition Examination Survey. Available at: <http://knhanes.cdc.go.kr>

23. Egan BM, Zhao Y, Axon RN. US trends in prevalence, awareness, treatment, and control of hypertension, 1988-2008. *Jama*. 2010;303(20):2043-50.
24. Joffres M, Falaschetti E, Gillespie C, Robitaille C, Loustalot F, Poulter N, McAlister FA, Johansen H, Baclic O, Campbell N. Hypertension prevalence, awareness, treatment and control in national surveys from England, the USA and Canada, and correlation with stroke and ischaemic heart disease mortality: a cross-sectional study. *BMJ open*. 2013;3(8):e003423.
25. Rosenstock IM, Strecher VJ, Becker MH. Social learning theory and the health belief model. *Health education quarterly*. 1988;15(2):175-83.
26. Rosenstock IM. Why people use health services. *The Milbank Quarterly*. 2005;83(4):Online-only-Online-only.
27. Billups SJ, Malone DC, Carter BL. The relationship between drug therapy noncompliance and patient characteristics, health-related quality of life, and health care costs. *Pharmacotherapy: The Journal of Human Pharmacology and Drug Therapy*. 2000;20(8):941-9.
28. Shalansky SJ, Levy AR. Effect of number of medications on cardiovascular therapy adherence. *Annals of Pharmacotherapy*. 2002;36(10):1532-9.
29. Schulz M, Krueger K, Schuessel K, Friedland K, Laufs U, Mueller WE, Ude M. Medication adherence and persistence according to different antihypertensive drug classes: a retrospective cohort study of 255,500 patients. *International journal of cardiology*. 2016;220:668-76.
30. Patel BV, Remigio-Baker RA, Thiebaud P, Preblick R, Plauschinat C. Improved persistence and adherence to diuretic fixed-dose combination therapy compared to diuretic monotherapy. *BMC family practice*. 2008;9(1):61.
31. Van Wijk BL, Klungel OH, Heerdink ER, de Boer A. Rate and determinants of 10-year persistence with antihypertensive drugs. *Journal of hypertension*. 2005;23(11):2101-7.
32. Hashmi SK, Afridi MB, Abbas K, Sajwani RA, Saleheen D, Frossard PM, Ishaq M, Ambreen A, Ahmad U. Factors associated with adherence to anti-hypertensive treatment in Pakistan. *PloS one*. 2007;2(3):e280.
33. Salas M, In't Veld BA, van der Linden PD, Hofman A, Breteler M, Stricker BH. Impaired cognitive function and compliance with antihypertensive drugs in elderly: the Rotterdam Study. *Clinical Pharmacology & Therapeutics*. 2001;70(6):561-6.
34. Schwartz D, Wang M, Zeitz L, Goss ME. Medication errors made by elderly, chronically ill patients. *American Journal of Public Health and the Nations Health*. 1962;52(12):2018-29.
35. Turner A, Hochschild A, Burnett J, Zulfiqar A, Dyer CB. High prevalence of medication non-adherence in a sample of community-dwelling older adults with adult protective services-validated self-neglect. *Drugs & aging*. 2012;29(9):741-9.
36. Toh MR, Teo V, Kwan YH, Raaj S, Tan S-YD, Tan JZY. Association between number of doses per day, number of medications and patient's non-compliance, and frequency of readmissions in a multi-ethnic Asian population. *Preventive medicine reports*. 2014;1:43-7.
37. Pasina L, Brucato A, Falcone C, Cucchi E, Bresciani A, Sottocorno M, Taddei GC, Casati M, Franchi C, Djade CD, Nobili A. Medication non-adherence among elderly patients newly discharged and receiving polypharmacy. *Drugs & aging*. 2014;31(4):283-9.



**Table 1 Baseline characteristics (n=116,677)**

|                                            | ARB-only group<br>N(%) or mean±SD | CCB-only group<br>N(%) or mean±SD | MPC group<br>N(%) or mean±SD | SPC group<br>N(%) or mean±SD | p value |
|--------------------------------------------|-----------------------------------|-----------------------------------|------------------------------|------------------------------|---------|
| Total                                      | 29,400 (25.2%)                    | 58,401 (50.0%)                    | 10,458 (9.0%)                | 18,418 (15.8%)               |         |
| Male(47.3%, n=55,210)                      | 13,834                            | 25,499                            | 5,507                        | 10,370                       | <0.01   |
| Female(52.7%, n=61,467)                    | 15,566                            | 32,902                            | 4,951                        | 8,048                        |         |
| Age (year)                                 | 59.3 ± 12.5                       | 62.4 ± 12.2                       | 61.1 ± 12.4                  | 56.9 ± 12.3                  | <0.01   |
| 20-29 (0.6%)                               | 263                               | 204                               | 48                           | 148                          |         |
| 30-39 (4.2%)                               | 1,426                             | 1,695                             | 417                          | 1,362                        |         |
| 40-49 (16.6%)                              | 5,455                             | 8,003                             | 1,653                        | 4,283                        |         |
| 50-59 (26.4%)                              | 8,259                             | 14,621                            | 2,681                        | 5,212                        |         |
| 60-69 (27.7%)                              | 7,761                             | 17,177                            | 2,944                        | 4,475                        |         |
| 70-79 (19.0%)                              | 4,997                             | 12,604                            | 2,138                        | 2,412                        |         |
| >=80 (5.5%)                                | 1,239                             | 4,097                             | 577                          | 526                          |         |
| Income                                     |                                   |                                   |                              |                              | <0.01   |
| Low (33.8%)                                | 9,396                             | 20,277                            | 3,646                        | 6,063                        |         |
| Middle (25.6%)                             | 7,304                             | 15,081                            | 2,647                        | 4,868                        |         |
| High (40.6%)                               | 12,700                            | 23,043                            | 4,165                        | 7,487                        |         |
| Residence                                  |                                   |                                   |                              |                              | <0.01   |
| Metropolitan (46.1%)                       | 13,711                            | 26,482                            | 4,771                        | 8,874                        |         |
| City (44.1%)                               | 12,878                            | 25,946                            | 4,670                        | 7,913                        |         |
| Rural (9.8%)                               | 2,811                             | 5,973                             | 1,017                        | 1,631                        |         |
| Health insurance                           |                                   |                                   |                              |                              | <0.01   |
| National Health Insurance (94.2%)          | 27,679                            | 55,113                            | 9,662                        | 17,406                       |         |
| Medical aid (5.8%)                         | 1,721                             | 3,288                             | 796                          | 1,012                        |         |
| Average No. of diagnoses                   | 3.6 ± 1.9                         | 3.1 ± 1.8                         | 3.6 ± 1.9                    | 3.1 ± 1.7                    | <0.01   |
| Average No. of medications                 | 4.1 ± 2.2                         | 3.9 ± 2.0                         | 4.9 ± 2.1                    | 3.7 ± 2.0                    | <0.01   |
| Average cost of anti-hypertension drug (¥) | 651 ± 185                         | 413 ± 141                         | 982 ± 316                    | 824 ± 196                    | <0.01   |
| Prescription period (day)                  | 1,174 ± 575                       | 1,477 ± 603                       | 1,164 ± 560                  | 972 ± 412                    | <0.01   |
| Total days supplied (day)                  | 954 ± 562                         | 1,218 ± 629                       | 1,000 ± 545                  | 855 ± 407                    | <0.01   |
| Medication possession ratio (MPR)          | 81.0±23.9                         | 80.9 ± 23.2                       | 85.3 ± 19.6                  | 87.7 ± 17.7                  | <0.01   |



1 ARB, angiotensin II receptor blockers; CCB, calcium channel blockers; SPC, single pill combination;  
2 MPC, multiple pill combination; SD, standard deviation  
3  
4  
5  
6  
7  
8  
9  
10  
11  
12  
13  
14  
15  
16  
17  
18  
19  
20  
21  
22  
23  
24  
25  
26  
27  
28  
29  
30  
31  
32  
33  
34  
35  
36  
37  
38  
39  
40  
41  
42  
43  
44  
45  
46  
47  
48  
49  
50  
51  
52  
53  
54  
55  
56  
57  
58  
59  
60

For peer review only

**Table 2 Medication adherences according to age and numbers of medications**

|                            | ARB-only group<br>(n=29,400) |                                 | CCB-only group<br>(n=58,401) |                                 | MPC group<br>(n=10,458) |                                  | SPC group<br>(n=18,418) |                                  | p value† | MPR<br>Differences‡ | p value§ |
|----------------------------|------------------------------|---------------------------------|------------------------------|---------------------------------|-------------------------|----------------------------------|-------------------------|----------------------------------|----------|---------------------|----------|
|                            | Crude<br>MPR mean            | Adjusted<br>MPR<br>mean*(95%CI) | Crude<br>MPR mean            | Adjusted<br>MPR<br>mean*(95%CI) | Crude<br>MPR mean       | Adjusted<br>MPR mean*<br>(95%CI) | Crude<br>MPR mean       | Adjusted<br>MPR mean*<br>(95%CI) |          |                     |          |
| Age group (n=116,677)      | 81.0                         | 81.6 (81.3-81.9)                | 80.9                         | 79.7 (79.5-79.9)                | 85.3                    | 87.2 (86.7-87.7)                 | 87.7                    | 89.7 (89.3-90.0)                 | <0.01    | 2.5                 | <0.01    |
| 20-49y (n=24,957)          | 77.6                         | 77.9 (77.3-78.4)                | 77.4                         | 76.1 (75.5-76.7)                | 83.1                    | 84.9 (83.7-86.0)                 | 83.7                    | 85.1 (84.4-85.8)                 | <0.01    | 0.2                 | 0.20     |
| 50-64y (n=46,085)          | 82.6                         | 83.0 (82.6-83.4)                | 82.9                         | 81.9 (81.5-82.2)                | 86.4                    | 88.0 (87.2-88.8)                 | 89.3                    | 90.8 (90.3-91.4)                 | <0.01    | 2.8                 | <0.01    |
| 65-74y (n=30,652)          | 82.4                         | 83.0 (82.5-83.5)                | 82.3                         | 81.4 (81.0-81.8)                | 86.5                    | 88.1 (87.1-89.0)                 | 90.6                    | 92.3 (91.5-93.0)                 | <0.01    | 4.2                 | <0.01    |
| >=75y (n=14,983)           | 79.3                         | 80.1 (79.3-81.0)                | 77.4                         | 76.6 (76.0-77.1)                | 83.3                    | 84.8 (83.3-86.3)                 | 87.5                    | 89.3 (88.0-90.7)                 | <0.01    | 4.5                 | <0.01    |
| Average No. of medications |                              |                                 |                              |                                 |                         |                                  |                         |                                  |          |                     |          |
| No.=1-2 (n=19,523)         | 79.6                         | 80.3 (79.6-80.9)                | 79.4                         | 78.1 (77.4-78.7)                | 85.8                    | 87.6 (85.2-90.0)                 | 85.9                    | 87.9 (87.0-88.9)                 | <0.01    | 0.3                 | 0.68     |
| No.=3-4 (n=48,388)         | 81.3                         | 82.0 (81.6-82.5)                | 81.6                         | 80.6 (80.2-80.9)                | 87.3                    | 88.7 (87.9-89.4)                 | 87.4                    | 89.2 (88.7-89.8)                 | <0.01    | 0.6                 | 0.99     |
| No.=5-6 (n=30,105)         | 81.9                         | 82.3 (81.9-82.8)                | 81.4                         | 80.5 (80.1-80.9)                | 86.4                    | 87.5 (86.7-88.4)                 | 89.3                    | 90.6 (89.9-91.3)                 | <0.01    | 3.1                 | <0.01    |
| No.=7-9 (n=13,071)         | 81.4                         | 81.6 (80.9-82.3)                | 80.4                         | 78.9 (78.2-79.6)                | 82.8                    | 85.3 (84.1-86.5)                 | 88.8                    | 90.9 (89.8-92.0)                 | <0.01    | 5.6                 | <0.01    |
| No.≥9 (n=5,590)            | 78.3                         | 77.9 (76.8-79.0)                | 78.3                         | 76.3 (75.2-77.4)                | 78.3                    | 82.5 (80.6-84.4)                 | 88.8                    | 91.2 (89.3-93.1)                 | <0.01    | 8.7                 | <0.01    |

ARB, angiotensin II receptor blockers; CCB, calcium channel blockers; SPC, single pill combination; MPC, multiple pill combination; MPR, Medication possession ratio; CI, confidence interval

\* Adjusted for factors associated with the patient (age, sex), condition (comorbidity), therapy (drug costs, number of concurrent drugs, prescription period), the healthcare system (insurance coverage), and the social/economic status (income, residence)

† p value of crude MPR mean

‡ MPR differences = adjusted MPR of SPC group – adjusted MPR of MPC group

§ p value of MPR differences.

Analyses were performed using ANCOVA

**Table 3 Sensitivity analysis for medication adherences according to age and numbers of medications**

|                          | ARB-only group<br>(n=29,400) |                               | CCB-only group<br>(n=58,401) |                               | MPC group<br>(n=10,458) |                               | SPC group<br>(n=18,418) |                               | p value† | MPR<br>Differences‡ | p value§ |
|--------------------------|------------------------------|-------------------------------|------------------------------|-------------------------------|-------------------------|-------------------------------|-------------------------|-------------------------------|----------|---------------------|----------|
|                          | Crude MPR<br>mean            | Adjusted MPR<br>mean* (95%CI) | Crude MPR<br>mean            | Adjusted MPR<br>mean* (95%CI) | Crude MPR<br>mean       | Adjusted MPR<br>mean* (95%CI) | Crude MPR<br>mean       | Adjusted MPR<br>mean* (95%CI) |          |                     |          |
| <b>20-49y (n=24,957)</b> |                              |                               |                              |                               |                         |                               |                         |                               |          |                     |          |
| No.=1-2 (n=6,827)        | 76.7                         | 76.6 (75.6-77.6)              | 75.8                         | 74.7 (73.4-76.0)              | 82.3                    | 84.1 (80.2-88.0)              | 83.4                    | 84.8 (83.4-86.1)              | <0.01    | 0.7                 | 0.78     |
| No.=3-4 (n=11,768)       | 78.2                         | 78.5 (77.6-79.3)              | 78.6                         | 77.5 (76.8-78.3)              | 85.6                    | 86.7 (85.2-88.2)              | 83.9                    | 85.1 (84.1-86.1)              | <0.01    | -1.6                | 0.01     |
| No.=5-6 (n=4,595)        | 78.1                         | 78.6 (77.4-79.8)              | 76.7                         | 75.3 (74.0-76.6)              | 82.2                    | 83.9 (81.6-86.3)              | 84.2                    | 85.3 (83.5-87.0)              | <0.01    | 1.3                 | 0.70     |
| No.=7-9 (n=1,360)        | 79.4                         | 79.3 (76.9-81.2)              | 77.5                         | 76.7 (74.1-79.4)              | 76.7                    | 78.6 (74.5-82.7)              | 81.9                    | 82.4 (79.0-85.8)              | <0.01    | 3.8                 | 0.13     |
| No.≥9 (n=407)            | 68.7                         | 67.1 (62.6-71.6)              | 72.4                         | 68.0 (63.1-73.0)              | 73.2                    | 81.4 (74.0-88.8)              | 86.5                    | 89.8 (82.4-97.1)              | <0.01    | 8.4                 | 0.05     |
| <b>50-64y (n=46,085)</b> |                              |                               |                              |                               |                         |                               |                         |                               |          |                     |          |
| No.=1-2 (n=7,933)        | 81.8                         | 81.9 (81.0-82.9)              | 81.4                         | 81.0 (80.1-81.9)              | 88.9                    | 89.2 (85.6-92.9)              | 88.5                    | 89.3 (87.8-90.7)              | <0.01    | 0.1                 | 0.45     |
| No.=3-4 (n=20,396)       | 82.5                         | 83.0 (82.4-83.6)              | 83.2                         | 82.3 (81.9-82.8)              | 88.3                    | 89.5 (88.3-90.6)              | 89.1                    | 90.4 (89.6-91.2)              | <0.01    | 0.9                 | 0.72     |
| No.=5-6 (n=11,657)       | 83.5                         | 83.7 (83.0-84.4)              | 83.8                         | 83.2 (82.6-83.9)              | 87.8                    | 88.5 (87.3-89.8)              | 90.3                    | 91.1 (90.0-92.1)              | <0.01    | 2.5                 | <0.01    |
| No.=7-9 (n=4,438)        | 83.4                         | 83.4 (82.2-84.5)              | 82.5                         | 80.4 (79.2-81.5)              | 81.9                    | 85.1 (83.1-87.1)              | 89.9                    | 92.3 (90.6-94.0)              | <0.01    | 7.2                 | <0.01    |
| No.≥9 (n=1,661)          | 79.2                         | 78.8 (76.9-80.6)              | 81.5                         | 78.7 (76.7-80.8)              | 78.2                    | 83.4 (80.3-86.4)              | 89.6                    | 91.3 (88.3-94.3)              | <0.01    | 7.9                 | <0.01    |
| <b>65-74y (n=30,652)</b> |                              |                               |                              |                               |                         |                               |                         |                               |          |                     |          |
| No.=1-2 (n=3,412)        | 81.3                         | 82.5 (80.6-84.4)              | 81.1                         | 80.3 (79.2-81.4)              | 88.8                    | 91.1 (85.5-96.8)              | 88.9                    | 91.0 (88.3-93.8)              | <0.01    | -0.1                | 0.94     |
| No.=3-4 (n=11,308)       | 83.5                         | 83.9 (83.0-84.8)              | 83.0                         | 82.5 (81.9-83.1)              | 88.7                    | 89.2 (87.5-90.9)              | 90.3                    | 91.6 (90.3-92.9)              | <0.01    | 2.4                 | 0.03     |
| No.=5-6 (n=9,267)        | 83.1                         | 83.1 (82.3-84.0)              | 82.7                         | 82.3 (81.6-83.0)              | 88.0                    | 88.3 (86.8-89.8)              | 91.5                    | 92.5 (91.2-93.8)              | <0.01    | 4.2                 | <0.01    |
| No.=7-9 (n=4,562)        | 81.3                         | 81.7 (80.5-82.9)              | 81.7                         | 80.4 (79.3-81.5)              | 85.4                    | 87.4 (85.4-89.4)              | 90.8                    | 92.5 (90.7-94.4)              | <0.01    | 5.2                 | <0.01    |
| No.≥9 (n=2,103)          | 79.8                         | 79.3 (77.5-81.1)              | 79.1                         | 77.1 (75.4-81.1)              | 78.6                    | 83.1 (79.9-86.2)              | 90.2                    | 92.5 (89.5-95.6)              | <0.01    | 9.5                 | <0.01    |
| <b>≥75y (n=14,983)</b>   |                              |                               |                              |                               |                         |                               |                         |                               |          |                     |          |
| No.=1-2 (n=1,351)        | 80.6                         | 81.0 (77.1-84.9)              | 75.7                         | 75.5 (73.8-77.3)              | 82.4                    | 83.1 (72.1-94.0)              | 85.4                    | 85.9 (80.3-91.5)              | <0.01    | 2.9                 | 0.69     |
| No.=3-4 (n=4,916)        | 79.2                         | 80.4 (78.7-82.1)              | 78.5                         | 77.9 (77.0-78.9)              | 85.2                    | 85.6 (82.6-88.6)              | 87.4                    | 88.8 (86.3-91.2)              | <0.01    | 3.2                 | 0.42     |
| No.=5-6 (n=4,586)        | 79.8                         | 80.5 (79.0-82.0)              | 77.4                         | 76.5 (75.4-77.6)              | 83.4                    | 85.2 (82.6-87.8)              | 88.7                    | 90.4 (87.9-92.8)              | <0.01    | 5.2                 | 0.01     |
| No.=7-9 (n=2,711)        | 79.3                         | 79.6 (77.9-81.4)              | 76.8                         | 75.8 (74.3-77.2)              | 83.1                    | 85.3 (82.3-88.2)              | 87.6                    | 89.4 (86.4-92.3)              | <0.01    | 4.1                 | 0.18     |
| No.≥9 (n=1,419)          | 77.8                         | 77.4 (75.1-79.7)              | 75.5                         | 74.9 (72.8-77.0)              | 80.2                    | 81.3 (77.1-85.4)              | 85.7                    | 88.6 (84.2-93.0)              | <0.01    | 7.4                 | 0.06     |

ARB,angiotensin II receptor blockers; CCB,calcium channel blockers; SPC,single pill combination; MPC,multiple pill combination; MPR, Medication possession ratio; CI, confidence interval

\* Adjusted for factors associated with the patient (age, sex), condition (comorbidity), therapy (drug costs, number of concurrent drugs, prescription period), the healthcare system (insurance coverage), and the

1  
2  
3  
4 social/economic status (income, residence)  
5

6  
7 † p value of crude MPR mean  
8

9 ‡ MPR differences = adjusted MPR of SPC group – adjusted MPR of MPC group  
10

11  
12 § p value of MPR differences.  
13

14 Analyses were performed using ANCOVA  
15  
16  
17  
18  
19  
20  
21  
22  
23  
24  
25  
26  
27  
28  
29  
30  
31  
32  
33  
34  
35  
36  
37  
38  
39  
40  
41  
42  
43  
44  
45  
46  
47  
48  
49  
50  
51  
52  
53  
54  
55  
56  
57  
58  
59  
60

For peer review only

1  
2  
3  
4 **Figure 1** Study population and data collection

5  
6  
7 ARB (angiotensin II receptor blockers), CCB (calcium channel blockers), MPC (multiple pill  
8 combination), SPC (single pill combination)  
9

10  
11 **Figure 2** Trends of medication adherences according to age group and the number of medications

12  
13 MPC (multiple pill combination), SPC (single pill combination), MPR (medication possession ratio),  
14 ARB (angiotensin II receptor blockers), CCB (calcium channel blockers)  
15  
16

17  
18 **Figure 3** Difference of medication adherences between MPC and SPC therapies according to  
19 combinations of pill numbers and age  
20

21  
22  
23 The number of drugs for which the adherence difference begins to increase is 3-4 in the elderly group  
24 ( $\geq 65$ year) and 5-6 in the non-elderly group (20-64year) ( $p < 0.05$ ).  
25

26  
27 MPC (multiple pill combination), SPC (single pill combination), MPR (medication possession ratio)  
28

29  
30 \*MPR difference = MPR of SPC group – MPR of MPC group  
31  
32  
33  
34  
35  
36  
37  
38  
39  
40  
41  
42  
43  
44  
45  
46  
47  
48  
49  
50  
51  
52  
53  
54  
55  
56  
57  
58  
59  
60

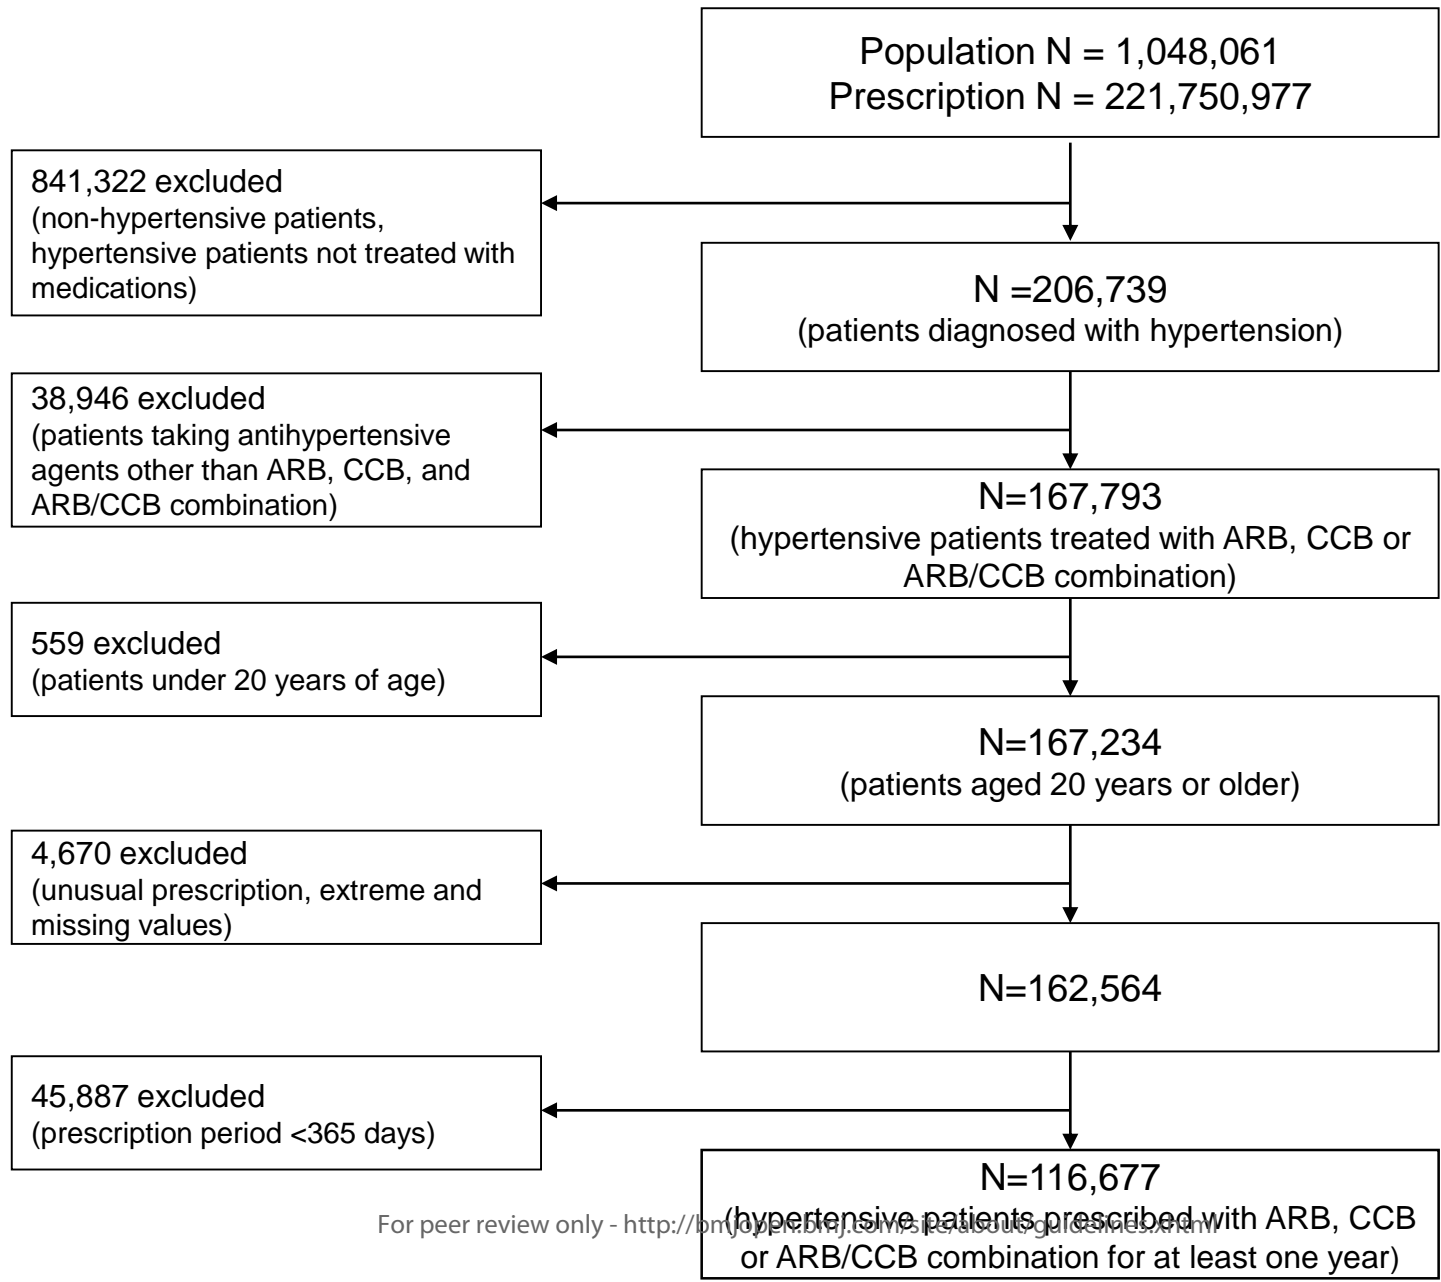

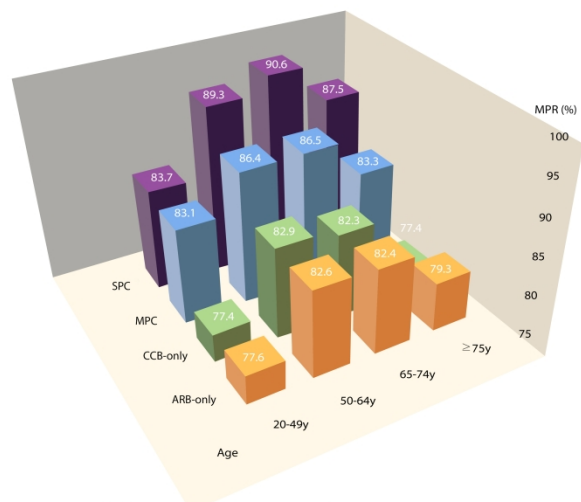

Adherence change according to age group

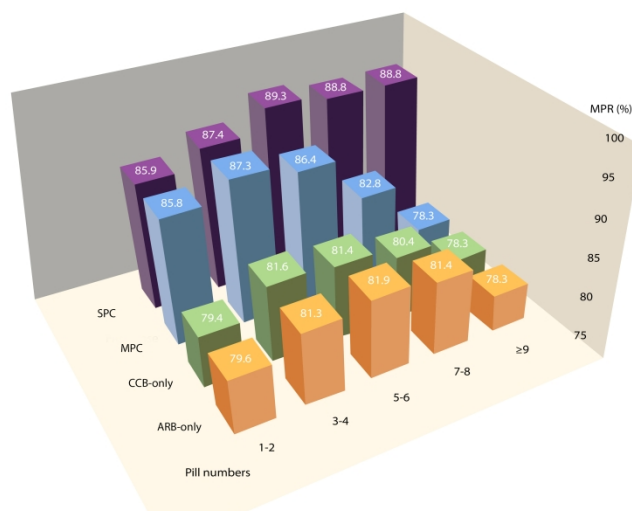

Adherence change according to the number of medications

Figure 2 Trends of medication adherences according to age group and the number of medications MPC (multiple pill combination), SPC (single pill combination), MPR (medication possession ratio), ARB (angiotensin II receptor blockers), CCB (calcium channel blockers)

324x580mm (300 x 300 DPI)

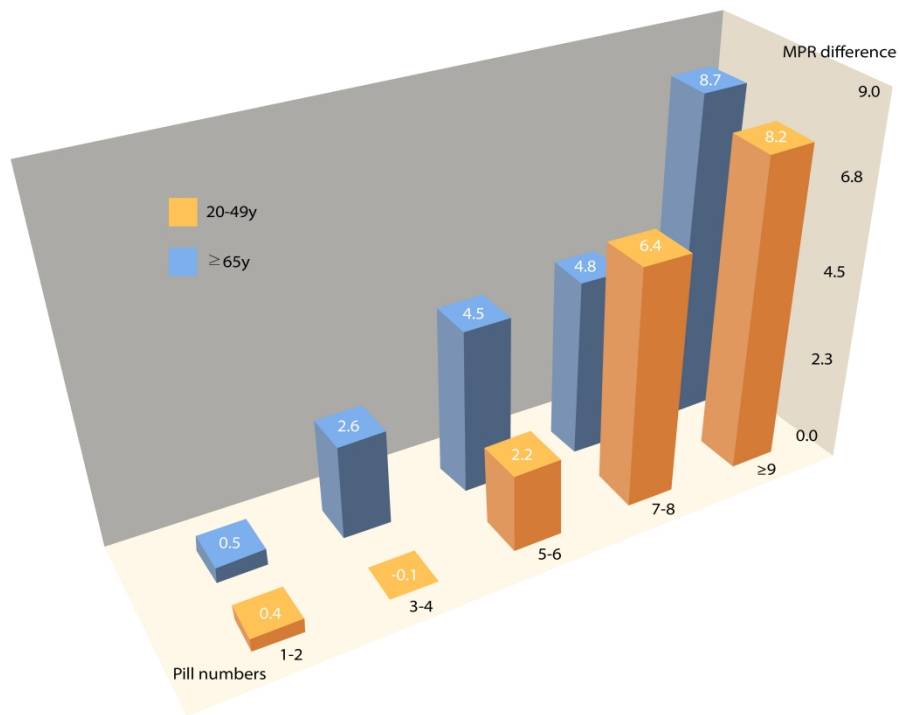

Figure 3 Difference of medication adherences between MPC and SPC therapies according to combinations of pill numbers and age

The number of drugs for which the adherence difference begins to increase is 3-4 in the elderly group (≥65year) and 5-6 in the non-elderly group (20-64year) (p<0.05). MPC (multiple pill combination), SPC (single pill combination), MPR (medication possession ratio) \*MPR difference = MPR of SPC group - MPR of MPC group

338x277mm (300 x 300 DPI)



1  
2  
3  
4 **Supplementary online contents. A single pill combination of antihypertensives**  
5 **does improve adherence: A Korean nationwide study**  
6  
7  
8  
9

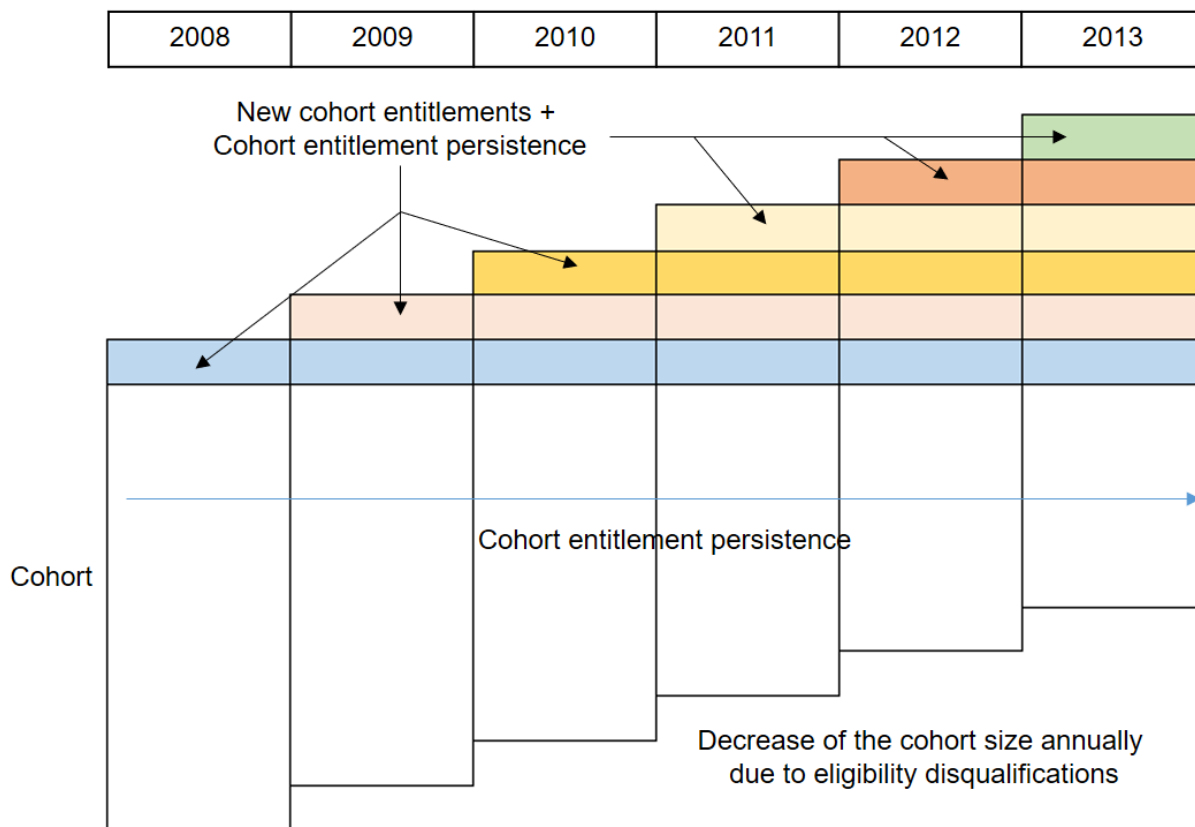

36 **Supplementary figure 1** Dynamic cohort design

37 Cohort size: About one million/year (2.2% of total population)

38 Cohort data include qualification data (birth, death, sex, family relationship, address, property, income,  
39 insurance type) and medical service use data (billing statement, medical records, diagnosis record,  
40 prescription record, etc.)  
41  
42  
43  
44  
45  
46  
47  
48  
49  
50  
51  
52  
53  
54  
55  
56  
57  
58  
59  
60

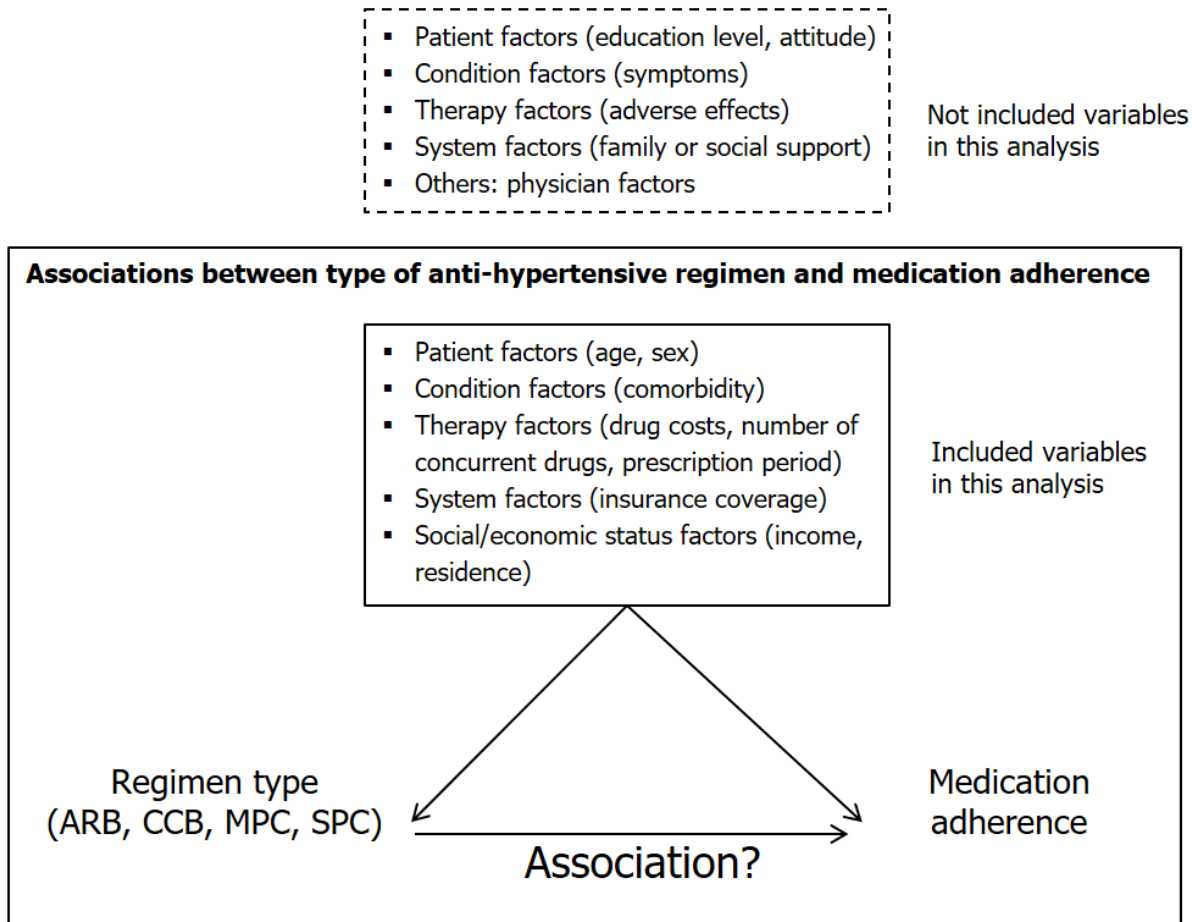

**Supplementary figure 2** Analysis scheme for factors related with anti-hypertensive medication adherence

ARB (angiotensin II receptor blockers), CCB (calcium channel blockers), MPC (multiple pill combination), SPC (single pill combination)

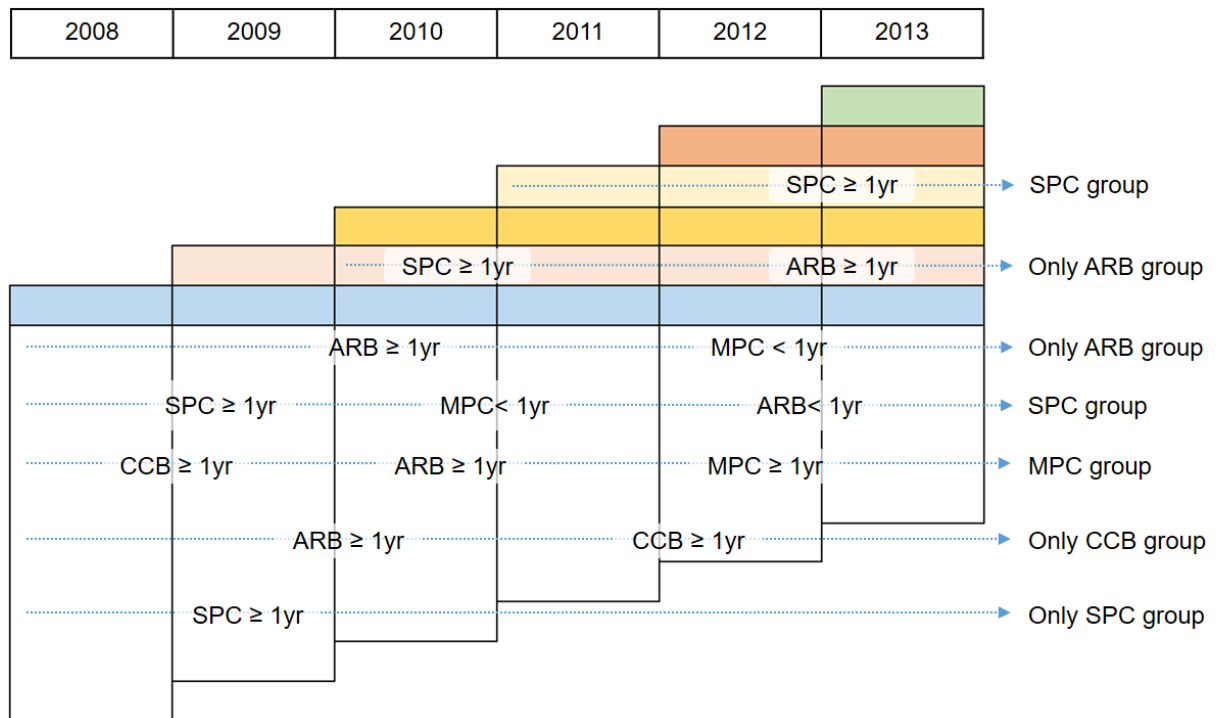

**Supplementary figure 3** Classification definition of anti-hypertension medication groups

ARB (angiotensin II receptor blockers), CCB (calcium channel blockers), SPC (single pill combination), MPC (multiple pill combination)

STROBE Statement—checklist of items that should be included in reports of observational studies

|                                |     |                                                                                                                                                                                                                                           |
|--------------------------------|-----|-------------------------------------------------------------------------------------------------------------------------------------------------------------------------------------------------------------------------------------------|
| <b>Title and abstract</b>      | 1.  | (a) Indicate the study's design with a commonly used term in the title or the abstract.<br>(b) Provide in the abstract an informative and balanced summary of what was found.<br><b>(mentioned in page 1-4 of the manuscript)</b>         |
| <b>Introduction</b>            |     |                                                                                                                                                                                                                                           |
| Background/rationale           | 2.  | Explain the scientific background and rationale for the investigation being reported.<br><b>(mentioned in page 5 of the manuscript)</b>                                                                                                   |
| Objectives                     | 3.  | State specific objectives, including any prespecified hypotheses.<br><b>(mentioned in page 5-6 of the manuscript)</b>                                                                                                                     |
| <b>Methods</b>                 |     |                                                                                                                                                                                                                                           |
| Study design                   | 4.  | Present key elements of study design early in the paper.<br><b>(mentioned in page 7-8 of the manuscript)</b>                                                                                                                              |
| Setting                        | 5.  | Describe the setting, locations, and relevant dates, including periods of recruitment, exposure, follow up, and data collection.<br><b>(mentioned in page 7-11 of the manuscript)</b>                                                     |
| Participants                   | 6.  | Give the eligibility criteria, and the sources and methods of selection of participants. Describe methods of follow-up<br><b>(mentioned in page 7-11 of the manuscript)</b>                                                               |
| <b>Variables</b>               | 7.  | Clearly define all outcomes, exposures, predictors, potential confounders, and effect modifiers. Give diagnostic criteria, if applicable.<br><b>(mentioned in page 8-10 of the manuscript)</b>                                            |
| <b>Data source/measurement</b> | 8.  | For each variable of interest, give sources of data and details of method of assessment (measurement). Describe comparability of assessment methods if there is more than one group.<br><b>(mentioned in page 7-11 of the manuscript)</b> |
| <b>Bias</b>                    | 9.  | Describe any efforts to address potential sources of bias.<br><b>(mentioned in page 7-11 of the manuscript)</b>                                                                                                                           |
| <b>Study size</b>              | 10. | Explain how the study size was arrived at.                                                                                                                                                                                                |

|                               |     |                                                                                                                                                                                                                                                                                                                                                                                                                                                                       |
|-------------------------------|-----|-----------------------------------------------------------------------------------------------------------------------------------------------------------------------------------------------------------------------------------------------------------------------------------------------------------------------------------------------------------------------------------------------------------------------------------------------------------------------|
|                               |     | <b>(mentioned in page 7-8 of the manuscript)</b>                                                                                                                                                                                                                                                                                                                                                                                                                      |
| <b>Quantitative variables</b> | 11. | Explain how quantitative variables were handled in the analyses. <b>(mentioned in page 7-9 of the manuscript)</b>                                                                                                                                                                                                                                                                                                                                                     |
| <b>Statistical methods</b>    | 12. | (a) Describe all statistical methods, including those used to control for confounding.<br>(b) Describe any methods used to examine subgroups and interactions.<br>(c) Explain how missing data were addressed.<br>(d) If applicable, explain how loss to follow-up was addressed.<br><b>(mentioned in page 9-11 of the manuscript)</b>                                                                                                                                |
| <b>Results</b>                |     |                                                                                                                                                                                                                                                                                                                                                                                                                                                                       |
| Participants                  | 13. | (a) Report numbers of individuals at each stage study- eg, numbers of potentially eligible, examined for eligibility, confirmed eligible, included in the study, completing follow up. And analysed.<br>(b) Give reasons for non-participation at each age.<br>(c) Consider use of a flow diagram.<br><b>(mentioned in page 12-13 of the manuscript)</b>                                                                                                              |
| Descriptive data              | 14. | (a) Give characteristics of study participants (eg, demographic, clinical social) and information on exposures and potential confounders.<br>(b) Indicate number of participants with missing data for each variable of interest.<br><b>(mentioned in page 12 of the manuscript)</b>                                                                                                                                                                                  |
| Outcome data                  | 15. | Report numbers of outcome events or summary measures over time.<br><b>(mentioned in page 12-13 of the manuscript)</b>                                                                                                                                                                                                                                                                                                                                                 |
| Main results                  | 16. | (a) Give unadjusted estimates and, if applicable, confounder-adjusted estimated and their precision (eg, 95% confidence interval). Make clear which confounders were adjusted for and why they were included.<br>(b) Report category boundaries when continuous variables were categorized.<br>(c) If relevant, consider translating estimates of relative risk into absolute risk for a meaningful time period<br><b>(mentioned in page 12-13 of the manuscript)</b> |
| Other analyses                | 17. | Report other analyses done- eg, analyses of subgroup and interactions, and sensitivity analyses.                                                                                                                                                                                                                                                                                                                                                                      |

|                          |     |                                                                                                                                                                                                                                   |
|--------------------------|-----|-----------------------------------------------------------------------------------------------------------------------------------------------------------------------------------------------------------------------------------|
|                          |     | <b>(mentioned in page 13 of the manuscript)</b>                                                                                                                                                                                   |
| <b>Discussion</b>        |     |                                                                                                                                                                                                                                   |
| Key results              | 18. | Summarise key results with reference to study objectives<br><b>(mentioned in page 14-19 of the manuscript)</b>                                                                                                                    |
| Limitations              | 19. | Discuss limitations of the study, taking into account sources of potential bias or imprecision. Discuss both direction and magnitude of any potential bias<br><b>(mentioned in page 19 of the manuscript)</b>                     |
| Interpretation           | 20. | Give a cautious overall interpretation of results considering objectives, limitations, multiplicity of analyses, results from similar studies, and other relevant evidence.<br><b>(mentioned in page 14-19 of the manuscript)</b> |
| Generalisability         | 21. | Discuss the generalisability (external validity) of the study results.<br><b>(mentioned in page 14-19 of the manuscript)</b>                                                                                                      |
| <b>Other information</b> |     |                                                                                                                                                                                                                                   |
| Funding                  | 22. | Give the source of funding and the role of the funders for the present study and, if applicable, for the original study on which the present article is based.<br><b>(mentioned in page 20 of the manuscript)</b>                 |
